# Supplementary material for: Elevated Myocardial VCAM1 Expression is Associated with Higher Risk of Dilated Cardiomyopathy or Ischemic Heart Disease-caused Heart Failure and Higher Immune Infiltration in Failing Myocardium
Source: Research Square preprint supplement (doi:10.21203/rs.3.rs-658306/v1), 2021-07-07
Supplement: Supplementary file 1 [file 3153c5095347eabc2f722b39.csv]

	group	FCN3	IL1RL1	MYH6	SLCO4A1	VSIG4	CYP4B1	MIR208A	ANKRD2	METTL7B	MYOT	ASPN	SFRP4	NPPA	HBB	FRZB	OGN	COL14A1	LUM	MXRA5	SMOC2	IFI44L	CCRL1	PHLDA1	MNS1	FREM1	SFRP1	PI16	PDE5A	C6	MME	HAPLN1	HBA2	HBA1	ECM2
GSM1379812	1	6.908873301	4.703193272	9.611168217	6.112211371	6.737778741	5.64312008	3.442972702	8.750299539	7.445243067	6.809556832	8.098973628	4.898088502	8.672852829	9.664252573	5.859476556	7.926024716	6.952298769	10.15298331	7.599244144	6.913295969	7.558942239	7.304735709	6.99905286	5.154669588	6.274224039	7.363875686	6.925949726	6.4072148	9.527154205	6.847883456	3.121723769	9.727824346	9.727824346	6.1505853
GSM1379813	1	7.476593114	4.361110928	9.314409474	5.673255265	6.180165698	6.303071434	5.267989986	10.0549798	6.196952084	7.298706721	7.891162235	5.646085996	5.555308702	7.982434581	6.407511838	8.155332092	6.548654347	10.15540538	8.081137031	7.657258991	7.320509226	6.717267729	6.217304304	4.522944338	6.154141779	7.564236013	7.255135713	6.78134776	8.907639002	6.612443428	3.920074907	8.773750228	8.773750228	6.327914202
GSM1379814	1	5.97774578	4.274271408	8.777038983	5.644656953	5.273760295	4.18039697	3.64813201	8.723079881	7.011340382	6.758724224	8.358084249	6.444507823	10.96331583	7.8022299	7.915096293	8.456574014	7.164162268	10.16005856	8.539451551	8.175232897	7.106647703	7.478454719	8.342237294	5.012650144	6.111043875	7.733283651	7.999803824	7.29102369	8.310526417	6.915552082	4.461604451	8.856504729	8.856504729	6.336522371
GSM1379815	1	4.846690712	5.305867733	5.279042916	7.761427841	9.563274036	5.835334225	3.154996353	5.669551704	6.721777579	3.878190764	7.701226094	9.557833842	3.989525584	9.634252689	6.398849005	8.903665564	8.524394584	11.09274763	9.77769041	7.705232549	10.25090057	6.810464084	7.322285913	5.374992656	4.748163839	6.415408545	7.164500128	6.592110692	5.481926664	8.152705877	3.063997001	10.07516811	10.07516811	6.75115613
GSM1379816	1	8.826125157	4.622631986	11.10962112	6.805679005	6.920452716	5.139790165	4.039333055	11.04286168	7.617928476	8.548919663	8.111646639	3.906439403	5.720071979	6.453637872	4.859000355	7.280929463	5.308944765	9.427143459	6.782336495	6.714838402	6.916887303	6.393611352	5.873810945	4.278979929	5.028440835	6.981297176	5.895591167	6.419464233	6.965105209	5.404075565	3.359418868	7.074010441	7.074010441	5.503493208
GSM1379817	1	7.284397206	5.394918689	8.920842914	5.905560479	6.139308496	6.655668355	4.835440535	10.14382426	6.614677625	6.942111669	8.466097466	6.229769109	9.063828357	6.189608944	6.644723453	7.959824737	6.93799934	10.2174596	8.351392203	7.979376349	7.489782659	6.846022621	6.960887137	5.355277302	6.303359422	7.513634929	8.374478709	7.012681742	9.288652417	7.371975516	5.368343005	7.552948272	7.552948272	6.448010661
GSM1379818	1	6.741061136	4.46523511	8.752467957	5.800364404	7.618293319	7.36850016	3.41885519	8.131522595	7.283380197	7.100755487	9.074801167	7.866557555	7.624780144	8.956595599	5.8207843	8.757638262	8.033105704	10.82452079	8.527514751	7.572955123	7.396991971	7.804592534	6.269945147	4.777445654	6.414528324	7.906290235	8.913004626	6.868132485	9.09760839	7.37518726	5.3710751	9.085596053	9.085596053	6.646605229
GSM1379819	1	7.091510315	5.240112986	11.12681368	6.207223448	6.985290302	6.607212282	4.929688056	7.869540225	7.50251651	6.700502011	7.845908338	5.2649891	8.527514751	8.611896824	6.388642698	8.470899896	6.896609319	9.95373132	7.226078315	6.855621828	7.472914697	7.630374787	7.276356743	5.178410359	5.534735427	6.464318152	7.746596558	6.539262003	9.638676936	5.840896827	4.058296534	9.138899527	9.138899527	6.212777
GSM1379820	1	7.64029985	4.702287939	8.938984874	5.769503292	5.925104291	6.131946694	4.164768263	9.946016729	7.066246531	6.923306633	7.678547982	5.418983553	7.94117954	9.671450896	5.678555972	7.965307874	6.331908189	10.22197464	7.263203935	8.239191803	6.460410905	6.39915088	6.767979283	4.749358306	6.06070751	7.784589181	7.29973677	6.853064474	9.435455117	6.787439364	3.154103231	9.677655827	9.677655827	6.2142694
GSM1379821	1	7.414207913	5.328196919	10.38009499	6.543864133	6.166658038	7.191654237	6.231599227	8.561539642	7.412472999	6.750828673	7.78699977	6.417316407	9.152678538	8.550908174	6.397276018	6.744555264	6.949734365	9.845143571	7.609824251	7.8079867	7.604137452	6.554942914	7.219302666	5.522968733	5.824391473	7.280249793	5.826993516	6.867498715	9.95567958	7.287149826	5.834758549	9.211765526	9.211765526	6.125156291
GSM1379822	1	7.456386995	5.390224711	9.200884523	6.94399988	6.054414081	7.513634929	4.985250452	9.578091358	6.672177137	7.399866313	8.380173458	5.348176386	8.019617254	10.09978713	6.271776651	7.983858625	6.627806882	10.33804701	7.944260486	7.935977087	8.035523061	6.142407051	6.818546644	4.5072718	5.595109688	8.093162061	6.766728643	6.435750491	8.707392757	7.532961844	4.028103436	10.37331225	10.37331225	6.282971992
GSM1379823	1	7.596141503	5.052344186	8.563486483	6.657889005	6.548352337	7.195739207	4.830825301	9.624808592	6.805354548	7.012681742	8.216243814	6.311600613	6.476161435	7.648525318	6.039881562	7.844151712	7.27532687	10.21268441	7.770088824	7.361754033	8.364375123	7.191958328	6.534852396	5.413036726	5.90468994	7.665478584	7.738850672	6.688383642	9.587807373	6.608425106	5.127891946	8.025905781	8.025905781	6.55882584
GSM1379824	1	6.716669936	5.055353916	10.53342983	7.182375247	6.827858971	6.05498028	5.074059007	8.550235753	7.142715635	5.944405068	8.472027162	5.547834801	5.877894517	8.870146493	6.058772431	8.797903894	7.479554477	10.50086602	8.770378589	7.713214478	7.560474425	6.755567586	6.867498715	4.921147126	6.094934499	7.595758038	7.12666712	6.934392896	9.120673625	6.818546644	3.353343823	9.356604429	9.356604429	6.517015536
GSM1379825	1	6.802712365	4.95209074	9.811158607	6.468962528	6.580653981	6.973606266	4.240369447	8.538785318	7.228119542	6.434223915	7.939435753	5.246434268	9.117888053	8.812440726	6.65159978	8.461322758	6.530139255	9.850162019	7.443802491	7.299031214	8.045110507	6.380569942	7.251000722	4.857176243	5.592712816	7.267979764	7.474804549	6.598680459	8.849018129	6.563624807	4.669021847	9.530526783	9.530526783	6.097873762
GSM1379826	1	6.892029535	5.215226422	8.229056038	6.086437885	6.879359411	7.655192831	5.068497058	10.43132826	6.456041093	6.777269174	7.338431039	4.845189197	6.970434604	9.900257686	6.038135872	7.899803378	6.692234728	10.15540538	8.213055322	7.686392768	7.038107609	5.986156711	7.203230684	4.854672777	6.134369692	7.689184404	6.394261989	6.416356793	8.552704046	7.648525318	3.072472656	10.45942001	10.45942001	6.891018693
GSM1379827	1	7.411721095	5.10367396	10.09778376	6.40689364	6.195205636	7.703594678	4.48012453	8.723079881	7.41638529	7.049818933	7.681686609	4.810155063	6.47401658	8.918530252	6.240754157	8.025196145	6.775747342	9.716692489	7.483938111	7.308870723	8.085450692	6.56794915	7.158153575	5.30004363	5.990125013	7.037803589	8.021934914	6.617519643	9.406477052	5.912513797	3.66227055	9.607626396	9.607626396	6.134369692
GSM1379828	1	6.953896921	4.599331189	9.219647132	5.572378631	5.786855079	5.74837541	3.695889369	9.649233577	6.862106239	6.15325058	7.444872279	4.522001257	4.104897462	9.358262616	6.274529337	7.943341572	5.780735084	9.836849384	7.54115114	7.216120575	7.48758855	6.466435536	6.393611352	4.939170669	5.637831598	8.214674317	6.615325066	6.54511842	9.031227985	6.295741867	3.047550482	9.776941854	9.776941854	6.225573705
GSM1379829	1	7.973848542	5.107330565	10.48699014	6.054704593	6.829716734	7.43176849	4.155959778	7.854065917	8.23757422	6.547726705	8.086482231	4.96378471	8.8860197	9.299953417	6.152647811	8.27284539	6.975845852	10.14144677	6.712952334	6.888746915	7.771740463	8.122126264	7.244333433	5.163230725	6.219355175	6.391138249	8.236576773	6.64691378	10.00982423	6.294849479	4.659045414	9.33073969	9.33073969	6.15174343
GSM1379830	0	10.28388018	8.538211013	10.29140188	7.142397467	7.693568359	8.751725549	4.548908632	9.959733668	7.508892575	7.720926696	5.135803924	3.733378229	5.670146685	8.498210087	4.999469424	5.796204132	5.13151036	7.483570535	5.752750305	5.400332712	6.02855185	5.136423726	6.044117801	4.204456853	4.587271596	6.657592486	5.874103837	5.585848931	8.826125157	4.844241322	3.553625081	9.718871529	9.718871529	5.366788659
GSM1379831	0	8.646415363	6.851458244	10.53958919	7.665858628	7.516206938	7.641085739	4.538023343	10.09778376	6.746158992	8.231785443	7.215134005	4.681642262	6.819187032	5.485852403	5.691344638	7.124276516	7.083317666	9.406477052	8.059887121	6.878103179	6.397276018	5.165709447	6.404088269	4.160345179	5.234043717	6.817545215	6.724708041	6.240754157	8.54504865	6.069127926	4.257115015	6.35275422	6.35275422	6.016414182
GSM1379832	0	10.22197464	6.991522562	11.77606139	7.141096632	8.436703448	7.141729498	6.148498366	10.33237808	8.37032048	7.700014041	7.646962629	4.129630799	5.782429594	4.868699033	4.882718952	5.862960963	6.402277542	8.521989462	6.272054766	6.280864276	6.433599056	6.995803077	5.502302959	5.25507655	5.100313851	6.1505853	5.713613383	6.122744383	9.905590865	5.890910392	4.857825748	5.625135759	5.625135759	5.664568831
GSM1379833	0	8.837439413	8.025681895	10.89929682	7.332468127	8.752467957	8.583537443	5.110047671	11.14950497	7.376247083	8.66402276	5.142215728	3.61034652	6.241076733	4.870199164	5.236758602	6.568278439	6.19549023	8.005486076	6.15294239	5.873810945	6.331608234	5.852945185	5.007449119	4.74109079	5.071009673	6.723739602	5.681733398	5.819597318	8.446419358	5.559996869	3.760477851	5.825704708	5.825704708	5.519703001
GSM1379834	0	10.72670868	6.496402872	11.74857452	7.079719109	7.716455547	6.973606266	5.872918849	10.78486481	7.62285381	9.10128636	6.58799926	2.594710107	6.641825427	2.833472838	4.054378423	5.769229854	4.930635634	7.466695832	6.024415956	5.714495872	5.951043085	6.566708914	5.946514936	3.105086822	4.72770581	5.265882866	5.621482437	5.940873794	7.804210128	4.612909475	3.975435627	5.47698921	5.47698921	5.162901276
GSM1379835	0	8.723079881	6.953896921	10.96331583	7.303357738	7.18015574	8.644338191	6.289355904	10.47500661	6.356789915	8.332089242	6.847566678	4.069522932	5.553497859	4.74287505	6.246244485	7.569906525	7.187030423	8.797903894	7.102738858	6.34191829	6.922637716	5.738386904	6.161717035	4.128790574	4.768834616	5.179051961	7.175744273	5.89262312	8.057552162	5.661059105	4.156840151	6.017756752	6.017756752	5.994662583
GSM1379836	0	9.838507152	6.661293207	11.15542488	7.645417895	8.51662411	8.9322628	4.991793638	9.195534508	8.107759786	6.937633352	5.754447455	4.762385704	4.778032363	5.871717408	6.332207177	7.54410088	6.907300754	9.16594869	5.950749116	6.200736715	5.802688264	5.833320395	6.171602789	4.324915733	5.582009071	6.365360104	5.973853541	6.311917206	8.191374674	6.754334618	3.582764674	7.177582299	7.177582299	6.361363853
GSM1379837	0	8.821451092	7.153781928	11.84149436	7.310344272	8.436081677	8.724463007	5.749792132	10.7770629	7.198781336	7.799298951	5.520313098	2.812105711	7.146967544	6.848199053	4.391481855	5.529659585	5.591219379	8.168574992	5.433526636	6.212472762	6.786778783	5.042678042	6.181626444	3.981392402	4.842381295	7.611324656	5.73988261	5.709860601	8.139158546	6.689392891	3.555096283	8.611552087	8.611552087	5.381625023
GSM1379838	0	9.300966617	7.310344272	10.80414069	7.612490089	7.791787202	8.392308606	4.960987742	9.970083211	8.10870345	7.671710663	6.082995955	4.346131042	8.044656031	4.988077539	4.738949298	7.084288625	7.085614778	9.133644852	7.720520283	6.345574074	6.136988074	6.254828199	7.112971215	4.008901995	4.855620053	6.069704601	6.897628857	6.00014073	8.057028262	5.884798211	3.778666751	6.441531631	6.441531631	5.913051456
GSM1379839	0	8.690220563	6.005595588	12.18904572	7.734075073	8.358084249	7.81668851	5.761494014	10.64202635	7.952612447	8.424132604	7.062952477	4.217956505	8.060354679	5.000940358	5.456774859	6.221453112	5.930099086	8.248364588	5.757362419	6.181336664	7.053046323	6.363537878	6.038717156	4.46348036	4.949254415	5.77126107	6.869103494	6.379945019	7.33912295	5.912226416	4.334776062	6.282825373	6.282825373	5.86705447
GSM1379840	0	10.15540538	8.026543886	12.56491911	8.017689975	7.982902198	7.951325912	6.757424609	8.703762643	7.816245812	6.792559545	5.270334505	3.255076232	9.007808053	4.462217381	5.10579491	6.50304502	5.614119166	7.94117954	5.923325033	5.951605343	5.792696962	5.52818149	5.621782406	4.425005119	5.043312347	5.963950643	5.643413012	5.57876192	7.897576647	5.665442533	3.824877222	6.394407599	6.394407599	5.17655468
GSM1379841	0	9.689385398	6.61277687	10.46078991	7.323010107	9.595906837	9.016775982	4.24569685	11.0758973	6.872877866	8.417539952	7.145243046	3.275514672	5.759146074	2.999391688	5.647799214	7.238827748	6.582172513	9.330228003	5.863882984	6.668695572	5.893515281	5.284207006	5.434690359	3.763509826	5.300672965	5.150395978	5.939123506	5.899734642	5.370745333	6.007894115	3.698258697	4.742434138	4.742434138	5.974467536
GSM1379842	0	8.595891955	5.297020238	10.49820093	6.57682296	7.96211776	7.571459272	4.451793343	8.021934914	8.0700987	6.138758773	7.008364893	4.694021676	8.068153853	5.542421061	6.59240099	7.138515804	7.020860669	9.35602972	6.375589487	6.786778783	7.426404746	7.401721297	6.169831642	4.931217927	5.645247607	7.221032723	6.884590272	6.308267103	10.07425411	6.281759414	4.21358682	6.519653586	6.519653586	6.470539922
GSM1379843	0	8.692256428	7.07548918	11.93276544	7.063641819	9.115892894	8.319356842	6.576227303	10.86355208	7.008048322	8.722337943	6.520108264	3.629927248	6.506123139	7.188056782	5.11904878	6.832201174	6.034087586	8.413921991	5.636680521	6.377157783	7.155781723	5.561431644	5.073479576	3.181610529	5.382239744	6.706296706	5.306841024	6.140365427	8.151133527	5.704923371	3.89268333	8.423859206	8.423859206	5.320901492
GSM1379844	0	9.440440228	6.163479674	12.36603587	7.170170479	8.483566299	8.028375551	7.087305718	9.202899947	8.048865648	6.805998626	6.503378106	3.392080489	6.855621828	4.350241523	5.359218723	5.469092769	5.275936917	8.390585867	6.46463669	5.998998447	7.211404797	5.840896827	5.483772129	3.885553072	4.946132778	6.598680459	5.206363118	6.041991709	6.973286468	6.461915399	3.500362502	5.410811591	5.410811591	5.872321482
GSM1379845	0	9.484421863	6.780081065	10.74975107	6.966794472	8.064871845	7.548583333	4.17923146	10.20300265	7.123550345	7.768435824	6.483028942	4.592371067	5.376794784	7.578323093	5.805666227	7.329665209	6.074028464	9.444231931	6.550861565	7.53965868	6.050321683	5.546660132	6.114890674	4.622053815	5.927500797	7.182728226	6.022662252	6.611815353	7.550425883	6.116923093	3.744642555	8.788671648	8.788671648	5.861489023
GSM1379846	0	10.03663575	6.901577607	11.18586609	6.216388695	8.143200731	5.010187302	6.543247107	10.08056318	5.992999935	7.011340382	8.406288305	3.321311667	9.313357532	4.07956358	4.969961434	7.407062957	5.928081129	9.287475281	6.90188997	6.088749866	6.599971682	6.407511838	5.777390098	3.878767846	5.418424855	7.220346275	6.36045503	6.949734365	4.936418843	4.354779183	6.366294295	5.879956204	5.879956204	6.048833655
GSM1379847	0	8.482974381	7.639935539	11.53247251	6.220864195	7.898037409	5.518802955	5.826409185	8.122126264	8.797903894	9.063828357	9.277022971	4.485916918	6.330095227	7.222385711	5.058136117	6.766107083	6.025633066	9.697932101	8.190351816	6.148187152	6.913602689	5.863550266	7.107283493	4.761779896	4.792770129	5.805666227	5.950465564	6.145316729	5.923636323	5.736324238	4.390863672	8.450944548	8.450944548	5.627383817
GSM1379848	0	8.317139991	4.957283573	10.26074426	5.822908409	6.861432306	5.841434932	4.603858051	7.909454644	7.148026467	6.373463104	7.69318936	5.210932698	5.762978356	7.943782491	5.7416406	7.447910838	6.824717242	9.572801711	8.053600565	6.851458244	7.775428019	7.312813316	6.340076411	4.283590792	5.297315317	7.468179536	7.302638943	7.149674031	8.762898878	6.922988555	4.130835593	9.367053657	9.367053657	5.672971682
GSM1379849	0	8.025681895	4.836667532	11.34790733	6.229471531	7.31703789	7.992073962	5.951330819	8.567386636	7.985648082	7.041393995	7.37059417	4.767602461	8.376719647	7.96211776	5.637263095	6.852141768	6.573351019	8.662593592	7.103344098	6.162347976	6.883305994	6.802113918	6.166029443	4.779228129	5.637536792	6.868460142	6.550228964	6.707607273	9.207021281	6.192877589	4.104043801	9.092366398	9.092366398	6.316486373
GSM1379850	0	9.643874262	7.470734329	10.4838363	7.151344559	8.617954731	8.59074224	3.945887923	10.00982423	8.33530607	7.68722542	7.525095343	3.884067447	9.262773982	4.107487395	5.392589045	6.915220186	6.423135879	8.45831979	6.596182766	6.325202435	5.896497688	5.690167889	6.462764725	4.953351642	4.839049665	6.532723211	6.978101463	6.090452855	8.089801763	6.002455432	4.145494219	5.66470366	5.66470366	5.97122356
GSM1379851	0	8.223105584	4.771280291	10.08882926	5.954903689	6.409056837	7.06756894	6.088452895	10.21977009	6.4649047	6.555630334	7.152039337	4.624877889	8.483566299	6.916212174	5.939123506	7.300486378	6.129215379	8.530063035	6.070270099	7.122892045	7.448996327	6.656315253	6.023228079	4.669021847	5.895305694	7.943341572	6.651264104	6.527919389	9.149657189	6.75526747	4.168366149	7.34356966	7.34356966	6.27814632
GSM1379852	0	8.959020162	6.384901992	11.35547154	7.28579679	7.886796548	8.397623177	4.124112465	10.30388978	7.134513253	7.810904644	6.629075164	3.517669408	7.88247526	4.22148814	5.017601302	6.72599807	6.459821218	8.803889394	6.824063847	5.982071256	7.630374787	6.295113436	6.194661366	4.245115318	5.192638566	6.325202435	6.421864752	6.016149296	8.203965388	5.575062543	3.66110136	6.287045738	6.287045738	5.357690639
GSM1379853	0	8.588125	5.39287286	11.52149016	7.062280755	7.845492226	7.861786073	5.876086148	8.933086084	7.390821871	6.398201903	6.951332309	4.607283569	5.5947802	6.270557668	6.100542338	6.902519149	6.433281835	9.018579433	6.360761602	6.811713775	7.964398457	6.498583791	5.422929593	4.26936576	5.783935415	6.971991321	6.89270236	6.597392532	9.093767396	5.78454875	3.856102823	6.744395866	6.744395866	6.420335982
GSM1379854	0	9.365262097	7.404568421	11.97419191	7.374832355	8.541296262	8.523187202	6.01414428	9.685242908	7.34595396	6.874506431	6.45952687	3.328801017	7.541866681	5.383481557	5.600225753	6.855937286	5.868758443	8.652805575	6.17631704	5.770377635	6.572729493	5.58057247	5.829351813	4.157701089	5.061506367	7.103344098	5.41393843	6.417933607	7.335935237	6.621563706	3.665597309	6.819961097	6.819961097	6.025347062
GSM1379855	0	8.447728547	7.255805855	11.24311735	6.524226118	7.588885419	8.513541588	6.286908042	7.295554769	7.711613148	7.30675261	7.307438648	4.781047939	7.310666433	8.245635268	5.60905439	6.99905286	6.759413384	9.313357532	6.541342492	6.996808921	7.212427515	5.329102776	5.84294422	5.365343409	4.943401743	6.447023692	5.806514051	6.054414081	7.533318339	5.767769103	3.88169436	8.452717955	8.452717955	6.36200484
GSM1379856	0	9.798537303	5.831307423	11.29038998	7.590021054	7.99573578	7.810476874	4.183253466	9.291932208	8.230166521	7.44560871	6.279660558	3.67603821	3.932011684	5.80762882	4.71687549	6.187192586	5.18666903	8.70005204	5.836819526	6.396070789	6.705954403	5.935943951	5.227808146	3.982312541	4.542605932	7.226078315	6.438949829	5.458900206	8.220432851	5.677694003	3.064636155	6.899777692	6.899777692	5.469092769
GSM1379857	0	8.560292549	6.940506373	12.06175189	6.668037866	8.998404064	7.657995893	6.247943929	9.107978954	8.640324917	7.670175978	8.212526014	3.730382748	5.693372812	7.648525318	4.883678756	7.577563861	5.401594155	9.94399177	8.199143554	6.45334847	6.698508709	5.310485917	5.626468255	4.193559873	4.752823356	6.937633352	5.631889357	5.84294422	6.560409451	5.64312008	3.452033309	8.732843311	8.732843311	5.749245425
GSM1379858	0	7.92351117	6.309131735	11.55268085	7.400654932	8.652128059	6.44295144	7.498805181	9.004262152	10.22197464	8.927215928	7.458580329	3.686840531	6.349578907	7.273612494	4.757130877	6.960288177	5.871717408	8.85985736	8.103503026	6.009956749	6.606871372	5.55000101	6.631919711	3.722743821	4.445764015	4.881800981	6.826571677	5.779520025	6.487142381	5.300672965	3.242077672	8.349397334	8.349397334	4.979031568
GSM1379859	0	9.655872413	9.012226	10.94798775	7.390821871	8.406830426	7.804210128	6.667065344	10.36959367	8.174192685	8.109686782	4.685359935	3.47589921	5.85206214	8.388822075	4.897162745	6.973924582	5.325416627	8.193482519	5.942026559	5.806241757	5.793833707	5.783935415	5.798857988	3.505218398	4.5694741	5.916858439	5.727915742	5.247988184	6.387727933	6.81110927	3.158007636	9.871541985	9.871541985	5.210621297
GSM1379860	0	10.10647377	7.445243067	11.87607338	7.919492524	7.964843828	8.483566299	6.131615987	10.44004637	8.649303166	8.323326822	5.365903502	3.347677903	5.53892354	7.981079608	4.611994945	6.54077255	4.96531987	9.029303266	6.382120803	5.882179407	5.318496653	5.456774859	5.531740905	4.186884643	4.671130284	7.204202411	5.782162279	5.517883153	8.229056038	5.571527262	3.235494318	9.221347203	9.221347203	5.444024626
GSM1379861	0	8.730262069	5.967740841	11.6952828	7.327578257	7.769254337	8.157370609	6.842154081	9.896659549	8.312682141	7.833675161	6.385831897	3.940502047	5.993773088	8.152182495	5.086896998	7.309261197	5.667137365	9.3941488	7.135517103	6.296341759	6.316486373	6.314407465	5.365903502	3.379427953	4.913761754	5.480987475	6.751788125	5.59543132	8.524985594	5.006207179	3.19920598	9.044427012	9.044427012	5.240112986
GSM1379862	0	9.412551267	8.653500746	11.12115149	8.370990767	6.886448854	5.954903689	6.263482372	10.21268441	8.432369827	8.281839145	5.286353013	5.524243822	5.644368532	8.860693352	5.21431212	4.953351642	5.816394017	8.175232897	7.83833562	6.375589487	6.050616476	4.919241459	7.882919457	3.329135982	4.320976599	4.595990303	6.245339762	4.703193272	6.290237056	5.468483573	3.764409321	9.842647548	9.842647548	4.731743401
GSM1379863	0	7.920352042	6.023526455	8.278375741	6.289938878	7.013648396	8.639023526	3.822835669	9.870715879	6.529466338	7.166156908	8.644338191	4.884920385	8.261354964	5.865320126	7.105985795	9.121594553	7.499906807	10.51214159	7.946502687	7.80052014	7.533700718	5.985263128	5.871432772	5.08322044	6.181044982	8.452400668	8.023826906	6.871324763	8.967494574	7.043967458	4.861450613	7.450337198	7.450337198	6.740405147
GSM1379864	0	9.379076773	7.903669536	11.95352672	7.014309497	8.800867622	7.635325355	6.506123139	10.40411488	7.551568921	9.637119804	7.948248941	3.034619727	7.584003234	3.582764674	4.970568181	6.415740021	5.12880597	8.921691914	7.163825445	5.634859084	6.884269172	5.99352393	5.697455895	3.893312044	4.746915375	6.053244406	5.885073888	6.739078334	5.913652332	5.636064589	4.615344808	5.807772606	5.807772606	5.918622903
GSM1379865	0	10.16430261	7.200145547	11.82650269	7.902817752	8.008288186	7.720926696	5.842318411	9.46013657	7.547441608	8.350839304	5.688159751	3.34437224	6.374984822	3.852143915	4.935510036	5.357690639	5.00468476	7.906735192	5.50023212	6.288410525	6.321552534	5.586495551	5.570082784	3.549249667	4.877097315	6.96711701	5.501986278	5.991306614	8.612576653	5.465492202	3.544868428	5.774025107	5.774025107	5.641658597
GSM1379866	0	9.202899947	8.621994707	11.28371806	7.49918459	7.727328037	8.460704623	6.063905858	9.912899418	6.817545215	7.460726189	5.675009814	4.151129425	7.39228278	5.630076298	5.531159378	6.171602789	6.529466338	8.739785508	6.752087103	6.461618482	5.180892495	5.408562296	6.293340289	3.962292451	4.511902669	5.877309776	6.856251249	5.611438026	6.958672746	5.571802923	3.874276584	6.684492417	6.684492417	5.153453982
GSM1379867	0	10.63859871	6.208368183	9.584960978	6.89270236	8.237078758	8.599879364	3.651987027	10.82452079	7.174743607	8.704477042	7.297284806	3.934758624	9.434282575	5.070387173	5.221884855	6.99905286	6.407847299	9.066514122	6.106660328	5.941720771	7.288940251	7.006142092	6.165157443	4.451793343	5.365343409	6.243858566	7.003555413	6.470539922	6.156496505	4.414113699	5.279662906	6.096556	6.096556	5.514265745
GSM1379868	0	9.283923287	6.26081487	10.1191542	7.580254795	7.514030779	8.545728589	4.333864581	11.07024955	9.891620171	7.034539751	6.636087362	3.34676134	8.762191277	3.153187042	5.383769281	6.666780205	6.436064983	8.09127308	5.765649974	6.630946588	5.785116489	5.514265745	6.492635978	5.201210842	5.195116891	6.19549023	6.669346172	5.596048085	6.826571677	5.849121839	4.036593762	5.506044313	5.506044313	5.474189444
GSM1379869	0	10.02427927	7.133255015	12.2698934	6.858497065	8.511567677	8.150614	7.648922393	8.95483328	9.002511359	6.332207177	6.277851349	3.504292564	6.69351176	3.674565854	4.556928558	6.124883533	5.2833156	8.273392515	5.453494172	5.870829929	5.908172882	6.086437885	5.526644767	3.594784184	5.023664447	5.839784222	5.583835995	5.626468255	7.563052631	6.308831108	3.393833569	5.485996891	5.485996891	5.58262435
GSM1379870	0	9.122665435	8.407425861	12.18904572	7.427125751	9.584960978	7.998426979	7.002550675	9.227354598	7.807536806	8.391208697	6.445483567	3.462167887	8.976642594	7.786588184	4.888929501	6.11162697	5.980065251	8.916111088	7.582143582	5.923325033	5.561131349	5.18666903	7.207309405	4.487411375	4.518607595	5.295816423	6.003887926	5.818392137	7.385881097	6.449527438	3.34829257	9.436069154	9.436069154	5.427793632
GSM1379871	0	7.928180238	4.891688215	8.11019962	6.527919389	6.954566214	6.014724473	3.292704133	8.974065036	6.542302735	6.618779558	6.331608234	3.72155175	5.441313368	5.865920359	5.56643421	7.398720431	6.564594412	9.59455268	8.188375143	6.951332309	6.85949742	6.341311075	6.75679718	4.31834207	5.724802022	7.749514255	5.455634764	6.872549814	9.183378893	5.895305694	3.40367053	7.671908007	7.671908007	6.152057932
GSM1379872	0	9.595906837	7.547441608	12.11148046	6.861112286	8.180367291	8.390023308	5.615342515	9.415097691	7.682414096	7.13127864	5.234338475	3.88825277	5.815842224	6.67501712	5.174733314	6.859837735	6.610266959	8.815454905	5.771572231	6.707607273	5.953421234	4.883351892	5.840605508	4.304406659	5.136727822	7.082717348	5.711279564	5.733175608	7.917246029	5.56325095	2.637861339	8.186593574	8.186593574	5.374123212
GSM1379873	0	8.4773887	7.097468023	11.93276544	7.368859833	8.037972877	9.024069279	7.143991326	9.65329778	9.033093697	6.684038547	6.289643052	3.382721397	7.239481228	3.145449927	5.236758602	6.108995604	6.085021179	7.931598429	6.09757473	5.878157272	6.863094236	5.595109688	5.666876454	4.48012453	4.560651032	6.237239174	6.182504963	5.345782167	9.709422351	5.612946812	4.051005439	5.239357551	5.239357551	5.980911208
GSM1379874	0	10.19139327	10.22437312	11.80863064	8.23757422	7.337032575	8.532624201	6.594594404	9.570022289	9.825507859	9.01323638	4.564300366	3.596526449	8.165033697	4.708393958	4.955512184	5.66045708	5.142215728	7.891162235	6.272054766	5.696364378	6.551790593	5.017601302	6.668391766	3.085520921	4.384038912	4.083862009	6.01414428	4.993839685	6.36045503	5.766854341	3.771798369	6.842312297	6.842312297	4.739889745
GSM1379875	0	10.43411111	7.875078035	12.24129797	7.213430507	8.852934634	8.874970775	7.440488057	9.815978109	8.423585807	7.274981922	5.739577492	3.570225599	4.979986063	3.557226275	4.763926849	6.631919711	5.157360315	8.091754683	5.544513116	6.160844638	7.091510315	6.237239174	5.453494172	4.074277279	4.897162745	5.390519722	6.481201858	5.171377038	8.885250636	5.279662906	4.127259667	5.371513822	5.371513822	5.488261577
GSM1379876	0	9.30770866	7.03585316	10.02840133	6.775130826	7.883313791	8.883702748	4.336293767	10.8681572	7.458226732	9.351461961	6.981655668	4.248147574	6.857213905	6.877801372	5.637831598	5.747800571	5.781035265	8.849018129	7.040715189	5.903793643	6.461301577	5.746327316	5.379811444	3.90123235	5.111966856	6.647212453	6.644723453	5.771850194	6.954241045	5.099371179	4.818519188	8.237326489	8.237326489	5.599323812
GSM1379877	0	9.613765278	6.022662252	11.65762442	7.720926696	8.242852976	7.357106838	4.945246943	10.50938829	7.878947149	7.429568887	6.318893925	3.72333629	5.203326757	5.080754107	4.558465521	7.263862748	4.93371995	8.730262069	5.61025699	6.191700009	6.623169263	6.388961519	5.196019139	4.548587035	5.301296318	7.280249793	6.343731401	5.46398752	9.136523885	6.10432584	3.209590286	6.697718753	6.697718753	5.521198753
GSM1379878	0	8.499408636	7.514750285	11.33336444	6.98562449	8.825385169	8.885250636	4.928719007	9.940329715	8.423585807	7.865680212	6.13464357	3.994783601	9.830432529	7.991082819	4.860840206	7.486144251	5.218285368	9.362957809	6.068520289	6.458290904	6.148498366	6.133148979	4.939747245	5.10608577	5.145272807	6.66036802	6.752416537	5.829049084	8.115216448	6.302169741	2.887894018	8.224461619	8.224461619	5.210932698
GSM1379879	1	8.133021241	6.178117364	10.13676004	6.529466338	6.682730604	6.238091374	3.837769109	7.983858625	7.461864071	6.476808986	7.987963512	4.606962275	6.422822492	8.890134445	5.614119166	7.499546247	6.073445034	9.638676936	6.428946202	7.358934671	7.537420914	6.696317253	5.992999935	5.491029099	5.827583933	7.343001587	5.961283095	6.396070789	9.886041572	6.407511838	3.807088427	8.858719641	8.858719641	6.184246202
GSM1379880	0	7.821710702	6.939870785	11.575487	6.663195724	8.611896824	8.054085473	4.665876687	10.46078991	8.817610743	7.462571431	6.482432279	3.8186854	6.205177271	6.763582031	4.929365364	7.211743119	5.271583092	8.923219194	5.385024033	5.989834676	7.555906876	6.853064474	5.737764272	4.607902734	4.833273806	6.833205142	6.929487473	5.783371717	7.697585713	6.185709401	2.836109627	7.389551182	7.389551182	5.138944781
GSM1379881	0	9.062930274	8.379009806	11.73443952	7.920352042	7.396622993	7.937725427	7.317376226	9.814243789	8.11717445	7.831998738	5.92037522	3.218362646	6.178117364	8.285753818	5.142215728	7.334906808	5.721553029	8.881443737	6.313175778	6.285139287	7.594931652	5.365343409	6.307362352	3.847724221	4.691737579	5.699207203	6.81236911	4.634546837	7.722491446	6.039309414	3.058698322	8.951899512	8.951899512	5.522651627
GSM1379882	0	8.777038983	5.860913066	11.44419575	7.521745524	7.308870723	6.711071622	7.361082562	9.197704246	8.397623177	7.968925507	6.762931776	4.227046096	8.277276356	5.331626118	6.602858794	6.875163344	6.524531097	9.354891745	8.67868479	6.703053465	7.698011381	5.951043085	7.070694796	4.365026627	4.969322215	5.520602337	6.55882584	6.584752011	8.243458189	5.970948829	3.705292149	6.804549508	6.804549508	5.159905184
GSM1379883	0	9.515462048	9.034830505	11.79290055	9.151654611	7.688762682	7.883751328	6.973606266	10.80414069	7.730178445	7.469987007	4.725151372	3.537458465	3.998627271	8.979318887	4.166501965	6.46463669	5.186374742	8.198640178	5.608461785	6.424977764	7.116909369	5.464603646	6.100268058	3.381535503	4.638288705	6.841493957	6.334682359	5.371671072	8.394170086	5.56857893	2.826123556	9.757669328	9.757669328	5.426271025
GSM1379884	0	9.62210941	7.307438648	11.09274763	8.700771852	7.54115114	9.245611521	6.850449017	9.976232674	7.288213847	8.093653138	5.8207843	3.45822293	6.334359856	8.31491154	5.245511596	6.778850196	6.02148828	8.464882333	7.205624659	6.771891238	6.939250601	5.485217004	5.732328758	3.688019653	4.988666995	5.269163811	7.003855317	5.692534479	8.049745302	5.305867733	3.323932279	9.568078425	9.568078425	5.185793563
GSM1379885	0	10.0448986	9.855281197	11.41038434	7.749140973	7.114916604	6.40689364	4.827690694	9.671450896	7.588885419	8.076897735	4.483169165	3.380655668	6.287488045	9.589161414	4.890445507	6.910771108	5.299137249	9.275979864	6.06768448	6.638382785	5.966335884	4.81227175	6.378666005	3.820167591	4.6026015	6.05707511	5.574169218	4.93520924	7.626736408	7.08822178	2.769610445	9.735073597	9.735073597	5.533240865
GSM1379886	0	9.641287456	7.224397686	11.16145137	7.832436327	7.663023295	8.612576653	4.753467292	10.40692028	7.828333469	8.225266982	5.949328868	3.793303852	5.778602175	4.603858051	4.686290649	6.135222176	5.130628553	8.548316695	5.656082104	5.679144396	6.282069781	6.507928017	6.178713104	3.870997423	4.753151664	6.239571974	6.476485109	5.700645478	8.553302632	4.663688333	3.414036891	6.262117557	6.262117557	5.102167192
GSM1379887	0	8.411011491	7.094534719	11.45374113	7.08822178	8.061367718	6.493902236	7.700826203	9.961628012	9.73012064	7.43361997	6.236935185	3.602994267	6.628430521	7.834932977	4.935510036	5.593623306	5.380981014	8.485463478	7.687968793	6.320641928	6.392937441	5.541521574	6.188693817	3.802762672	4.35448171	4.809546707	6.455446431	5.461656612	5.668954307	5.604693231	3.532736433	8.683288789	8.683288789	5.004033958
GSM1379888	0	9.204010235	7.082717348	11.575487	7.404568421	7.557791838	8.892645801	6.437612706	9.627328487	8.203965388	7.808407646	6.101114232	4.195135057	4.302352944	8.297159151	5.402205961	6.519203236	5.729744697	8.271273846	5.877309776	6.05678438	6.22206951	5.816977173	5.075844939	4.615683757	5.056277318	6.809556832	6.614347934	6.014724473	8.366795356	5.696076206	2.92066699	8.769978746	8.769978746	5.537173066
GSM1379889	0	9.353690574	7.159486826	10.06555646	6.81463088	8.925579688	8.24950006	4.770681017	9.970083211	7.743699963	7.185702024	6.344644418	3.706464328	4.503916608	4.577005278	4.935802583	7.678547982	5.830156286	9.456404912	5.998698099	6.618451029	6.475565532	5.592712816	5.42047381	4.035454906	5.081690542	6.692234728	6.309771518	5.597825814	7.084952467	5.939123506	2.67268203	6.106534695	6.106534695	5.612025565
GSM1379890	0	9.499863886	6.970434604	10.30134652	6.836455798	8.080669697	7.884628639	4.214792862	10.65605517	7.379055077	6.989533193	5.522374652	3.112200968	4.927550566	4.341672801	4.381710602	6.481499313	5.852364496	7.987506331	5.922422504	5.548774982	5.900301009	5.30618443	5.491609849	4.70506029	4.638605096	8.388822075	5.95846999	5.257280233	6.82105105	6.308267103	3.17440667	6.819022986	6.819022986	5.499368256
GSM1379891	0	8.131987269	7.980251886	11.84149436	8.260825387	6.528862969	8.225266982	7.983374378	11.01566358	7.413144116	7.683580857	5.819008228	3.614573587	4.238299734	6.227677875	4.828308015	6.771247847	5.69367201	8.366161778	5.704073435	6.309449187	6.597733569	5.612025565	5.77271196	3.980808157	4.73111966	6.789702368	6.286335007	5.670743478	8.645767795	6.144393099	2.709849136	7.606976085	7.606976085	5.675912895
GSM1379892	0	8.405038637	6.342520552	11.36362261	7.379392775	7.209398353	8.168574992	5.950749116	10.43132826	8.012993893	8.534523341	6.918837824	3.640893272	6.876126576	5.438603804	5.132739061	7.306402434	5.940873794	9.430717703	7.330713411	6.963148828	6.511315725	5.756705009	5.400960647	4.074563783	5.21617531	7.362458231	6.265207262	5.905852041	8.627406322	5.477142856	3.209253878	6.793314972	6.793314972	5.522082117
GSM1379893	0	8.520855717	7.085265861	9.86062464	7.274272259	8.099443213	8.284179158	4.762695018	11.24311735	7.571073871	9.321362959	5.666876454	3.69620357	5.854997979	8.14013338	4.688694314	6.616568874	5.422295782	9.127688432	6.683392218	6.563308059	6.779464331	5.660166885	5.470256653	3.911878343	4.925758348	5.455334511	6.022411384	6.015287375	7.25614472	5.436200648	3.25719363	8.553003339	8.553003339	5.48040797
GSM1379894	0	8.208273772	5.14643201	11.52149016	6.702353187	8.697290333	8.414537991	4.855003883	9.678323788	7.829918078	7.493237354	7.665091323	5.529659585	9.662937928	9.506215858	6.681417689	7.925216019	6.594924936	10.11059346	6.331908189	6.860800324	6.540498216	6.440144637	5.98927212	4.213294441	5.243416566	7.206648242	6.925949726	6.637108543	9.392838863	6.44383302	3.347364358	9.928057385	9.928057385	6.181044982
GSM1379895	0	9.66851415	7.296916448	11.53247251	7.230097745	8.445148281	8.260296629	5.85771248	9.884267691	9.326872103	8.772703219	5.44964647	3.565277981	8.654157006	7.065633945	4.469126996	7.463686613	4.958217787	9.033969527	7.130587601	6.226801912	6.26405359	5.889459869	5.456476969	4.04382108	4.720052426	6.398534777	6.551790593	5.441877527	7.722491446	5.872008338	2.800904169	7.784385168	7.784385168	5.011710776
GSM1379896	0	9.791758491	6.379638889	11.63333055	8.084906437	7.854065917	8.467236751	5.327600489	9.548565989	8.029817252	7.32405869	5.582009071	3.648745892	5.079174639	4.649463244	4.8193832	6.446113929	5.060257896	8.136033496	5.59901391	5.973530101	5.296113921	6.50012176	5.06238527	4.034248304	4.890766146	6.96250269	6.331298616	5.743389597	9.384862414	5.196019139	3.026952535	6.479765363	6.479765363	5.159263497
GSM1379897	0	9.808129136	7.342349381	11.02670596	7.752354209	7.784181156	7.927334667	5.482558353	10.62542528	8.950597557	9.038253231	6.664116906	3.80098405	8.759938737	4.439427641	5.305867733	6.45858382	5.374992656	9.109896902	7.401001418	5.999564865	6.190807859	6.233352837	5.958154425	4.143705136	4.609512145	5.341213665	6.357420528	6.043223912	6.009691312	5.093307327	4.300547058	6.156336619	6.156336619	5.017270564
GSM1379898	0	8.197098106	5.423892601	8.362037466	6.584752011	7.383351254	6.82105105	3.339358534	9.858898803	7.492050859	6.68434524	7.724032084	4.356861201	5.884798211	9.853575638	5.697455895	7.909001471	5.901170471	10.23183308	7.391197869	7.271574737	7.295554769	5.774423615	7.260336306	4.55754714	4.900535935	7.97797223	6.452074717	6.111043875	7.527352864	6.311600613	3.306790429	9.704292912	9.704292912	6.036661667
GSM1379899	0	7.615623983	6.517928851	10.24383146	7.225040723	7.702412551	8.526912264	4.13555159	10.25828423	7.330713411	8.063880135	6.962820128	3.933774834	6.521358319	9.183378893	5.279662906	7.712017945	6.328224774	9.581038932	7.214123059	6.393611352	7.469268557	6.16141608	6.486503558	4.070692339	5.139222462	6.353466996	7.314510485	5.795019521	8.532624201	6.200160539	3.963803868	9.864763644	9.864763644	5.767769103
GSM1379900	0	9.275979864	7.24536401	10.95308232	7.765979578	9.025800188	8.664686446	3.756683444	9.578091358	8.7904958	7.223098843	6.515422222	3.672600485	6.124263586	9.790088145	5.533240865	7.286470687	5.502877605	9.208145011	5.665145659	6.152368331	6.25395819	6.326104935	5.005902071	4.848206889	4.969322215	6.158836157	7.526212976	5.530274858	8.058981252	5.833881288	3.424185614	10.04594086	10.04594086	5.687282053
GSM1379901	0	9.597186548	7.275674662	11.73443952	7.176418103	7.675477905	6.642843515	8.176248454	10.35941416	9.95567958	7.481408704	6.279030216	3.593913078	5.253183978	5.48437567	4.822502982	5.350009887	4.950797144	7.699198035	7.30675261	5.881874246	6.145013131	5.292103361	6.177540218	3.666489158	4.468491138	6.213376967	5.555608027	5.319714676	6.212472762	5.297020238	3.254484345	7.327397471	7.327397471	5.154361037
GSM1379902	0	9.506215858	5.901170471	11.99423485	7.751947489	6.971052347	8.100477616	7.249335528	10.27383151	7.479554477	7.729389656	5.731186045	3.391187326	4.983040283	3.990089987	4.489858524	5.669551704	4.932763355	8.089801763	6.134369692	5.960744485	6.66191169	5.632790525	5.781035265	3.514144839	4.925163282	7.337376638	6.209786837	5.939722012	9.601277118	5.749245425	3.004157305	6.810623604	6.810623604	5.050473465
GSM1379903	0	8.708039459	7.347377063	11.12115149	7.803413775	7.450524312	8.172648034	4.765749697	8.584191763	7.493615745	6.56794915	5.84585905	3.480956287	5.237344963	9.640038052	5.324159515	7.495150437	5.440695569	9.478289597	7.22171706	6.872252449	6.686251006	5.441012179	5.848543142	4.270864947	4.776834532	6.250703936	5.59543132	5.147352908	9.259476594	6.426484222	3.078728548	10.57180596	10.57180596	5.623217664
GSM1379904	0	8.052662838	6.66995264	9.01323638	7.840759856	8.218324022	9.103161717	4.26680964	9.243590989	6.517312317	7.417157713	6.843449255	4.570658551	5.117518671	9.638676936	5.299439472	8.155835897	7.019882012	9.783897406	7.357451652	7.15241525	5.460130146	5.06513612	5.94764033	3.802143456	5.176283545	7.070694796	6.328224774	5.894118101	7.365659307	5.966886108	3.282158848	10.45942001	10.45942001	6.568954003
GSM1379905	0	8.838147024	5.08322044	9.002511359	6.56395624	6.853358696	6.631252034	4.732965613	11.01566358	7.850666783	8.395340766	7.913782729	4.766970775	9.279346391	10.09978713	5.90644306	7.494764381	6.122744383	9.776193298	7.963495077	7.074815387	7.604893735	7.157455095	6.869732441	4.562774359	5.293925814	7.471491693	7.08075032	6.36804299	8.467236751	5.955469625	4.474566975	10.42455893	10.42455893	5.951888972
GSM1379906	0	8.29838655	5.662573834	9.65329778	6.71263467	7.987963512	5.441586919	3.687704458	9.006939834	7.615623983	7.923056028	10.10202646	7.157783677	9.10128636	9.07205629	6.258137341	9.616542454	7.449753708	11.08713899	9.905590865	7.636819192	7.640685734	8.165033697	7.304452041	4.572447515	5.57034034	6.616251572	8.079756316	7.031877632	6.465519585	6.601570919	7.658392194	9.173680237	9.173680237	6.927915798
GSM1379907	0	8.514185052	6.933135827	9.768798852	7.161492517	9.350241634	6.590230698	3.73427028	10.21502879	8.953213783	9.085103389	9.096693785	4.676983061	10.03860496	9.45760716	6.666102263	9.105949652	7.080408954	10.90384033	9.544496697	7.248672918	6.315628056	6.760059598	6.669043724	4.61991693	5.369844585	5.340577152	8.055603249	6.568954003	6.256336531	5.637831598	5.500796724	9.808896371	9.808896371	6.131946694
GSM1379908	0	8.882170762	7.627918228	10.6526652	7.047248172	8.406830426	8.129535948	4.092413276	10.16005856	7.457854476	8.280104221	5.894118101	4.080962623	7.955328393	9.605428303	5.581155281	7.559313619	6.058457647	9.358262616	6.586959527	5.994662583	6.501445026	6.364773253	6.284546442	4.027252769	4.939443986	5.664301138	6.118658467	5.724215878	7.879777328	5.579640502	3.04507328	10.14263551	10.14263551	5.171669734
GSM1379909	0	8.750994211	7.244001926	10.89047381	8.424712389	7.422439431	7.969818567	5.95371597	9.867207221	7.759701673	7.636432083	6.280580402	4.055891795	7.151344559	8.350839304	4.988936492	7.863527523	5.982625542	9.405200621	7.558556569	6.883305994	5.857412039	5.278062149	5.688159751	3.592107412	5.166001919	7.165478579	5.596048085	5.624134347	7.977542662	5.69427827	2.897604453	9.724889451	9.724889451	5.475068182
GSM1379910	0	9.0430943	6.106409062	10.73462639	7.348128072	9.674191456	9.004262152	4.330001224	9.316787446	8.351392203	8.533220308	8.100477616	4.657532217	6.45334847	4.492169345	5.802153961	8.175232897	6.6386969	10.23667863	6.767979283	6.075192568	6.513804532	7.000684659	5.98699651	5.041459646	5.579340226	5.991884826	8.226970589	5.906154139	8.87651773	6.14300326	4.925163282	6.304683179	6.304683179	6.037515134
GSM1379911	0	10.18700256	8.434261581	11.21720555	7.642277753	8.646415363	7.953056782	6.138758773	10.4838363	7.86003935	9.419979449	4.487737667	3.231388283	7.093164183	8.112131727	4.444287799	5.339972231	4.583528048	7.325837278	5.693372812	5.442492192	5.205112482	5.282024948	5.907612395	3.542790908	4.18782992	5.790333071	5.048058401	5.349405148	7.300893869	5.701269167	2.986731701	8.730643095	8.730643095	4.888614997
GSM1379912	0	8.829179633	6.350809963	10.94798775	8.009643884	7.887252291	8.562825805	5.45739738	10.49512684	7.875078035	7.571459272	7.617928476	4.13499759	5.23115644	8.118639828	5.062687034	8.289330729	6.848531897	9.82711671	6.828453319	6.948116749	6.130432372	6.066819085	5.424180507	4.115858543	5.210032073	6.038717156	8.266876083	5.982071256	8.494666375	5.587357847	3.040601264	9.335447531	9.335447531	5.850899783
GSM1379913	0	9.120673625	8.6887603	11.37175856	7.598864422	6.656315253	8.421171046	5.235589324	8.453035242	7.466302139	7.407413985	4.916795334	3.41885519	6.81110927	9.077676503	4.429500207	6.095824251	5.09025629	7.913375698	6.075506259	6.016414182	5.283000991	5.56857893	5.697195136	4.904827078	4.450879121	6.16141608	6.210101201	5.176283545	9.845143571	5.110978733	2.741702392	9.232095651	9.232095651	5.077089335
GSM1379914	0	8.774099117	6.277252737	10.81639722	7.203230684	7.948248941	8.555182773	5.834758549	10.36422424	8.069616219	7.262168433	5.851199702	3.758150724	3.443298401	5.904415781	5.207278172	7.637552222	5.210932698	8.817610743	6.687763806	6.508219293	6.50459872	5.758260353	5.17108042	3.341715212	5.25445187	7.073849953	6.899613986	5.668647107	8.639680131	5.690752326	3.09604009	7.513094652	7.513094652	5.555002513
GSM1379915	0	10.11059346	8.255912697	11.0642058	7.462571431	6.624434192	7.496952868	6.475565532	10.35126903	7.838760705	8.325493756	6.180450402	3.689774657	6.27113218	4.734284623	5.53627823	6.899613986	5.492483285	8.951458549	6.973286468	6.518255245	5.44964647	5.384706857	5.923325033	3.803595983	4.811060456	6.032370932	5.466353047	5.709596673	8.191924156	5.525125165	2.864405826	6.113566166	6.113566166	5.704374632
GSM1379916	1	8.050720601	4.96378471	11.74857452	5.255391231	6.272977833	6.542302735	5.791580945	9.295493653	6.555630334	5.614420159	7.055703792	3.750502421	4.464638715	8.457765338	5.800056823	7.790591668	5.839784222	9.177185597	7.068211363	6.834851179	8.257009694	6.368958716	5.883947647	4.662431112	5.933918774	8.376719647	5.97774578	6.66546086	7.256530057	6.527023046	4.062663109	8.721975984	8.721975984	6.328224774
GSM1379917	1	7.098430481	5.57752465	9.456404912	5.357690639	6.732117345	6.062452319	4.685359935	8.901322103	7.343752022	7.221032723	9.384862414	7.142715635	11.25672309	9.03657514	8.445148281	9.016775982	7.516936759	10.68365515	9.186480783	8.491661501	7.637552222	7.087597391	7.864810114	6.286908042	6.484560344	6.029719629	8.603844773	7.884628639	8.408650222	7.86524358	6.738433656	9.572089597	9.572089597	7.285075833
GSM1379918	0	8.959020162	4.711398894	11.17369397	6.838366267	6.654710931	5.243416566	4.189945212	11.09274763	7.674038738	8.822980993	7.851936145	3.796234723	5.762084679	6.189608944	4.618696373	7.153439454	5.340577152	9.326872103	7.17872842	6.678197858	6.847883456	6.535512722	6.07262282	3.891515274	4.93856774	7.019543512	6.005017005	6.439547721	7.122892045	5.338115919	3.345565887	7.162327668	7.162327668	5.409471998
GSM1379919	0	8.890993022	5.398167061	10.33503632	6.646605229	8.98791739	6.778529295	4.676669468	9.241393037	7.059609507	6.791601809	7.223424061	4.758957431	8.346170863	4.237702755	5.441012179	7.89286101	6.716669936	9.930800008	8.212007971	7.270833587	6.721777579	6.120967017	6.853707486	4.364432857	5.361672132	5.276858928	8.207241117	6.02855185	8.042734191	5.930099086	3.767965454	6.647375999	6.647375999	5.791580945
GSM1379920	0	9.235990201	7.052092892	11.42732347	7.461864071	8.261898814	8.301082345	4.867772983	10.26594985	8.890134445	7.772592042	6.396070789	3.997725133	3.982601989	6.08181771	4.988666995	6.926305374	5.14438252	9.211278714	5.557664194	6.617826007	6.476485109	5.836524602	5.193558896	5.035955492	5.156129356	7.144326818	6.151447025	6.075506259	8.23757422	5.963370579	3.544868428	7.131108613	7.131108613	5.683835186
GSM1379921	0	8.596597312	6.292075156	10.70103332	8.187368942	8.281839145	7.705232549	5.73988261	8.890993022	7.615217955	6.506720503	7.069750379	3.41885519	7.161146309	8.079286809	5.255391231	7.974711817	6.02855185	10.12577441	7.787778896	6.727613245	8.012501284	5.362296639	5.825557345	3.988655786	5.01419664	7.015950836	6.034087586	5.677694003	8.514185052	6.702717489	3.334774719	8.82021755	8.82021755	5.941720771
GSM1379922	0	9.862292337	9.114940889	11.38674081	7.745386365	7.599626819	7.722491446	7.817536538	10.29140188	9.408825589	9.289726732	4.673903556	3.587695521	5.274706588	7.869540225	4.824035513	6.459193436	5.020922693	8.582933702	6.692569978	6.19051457	6.040467996	5.323867719	5.984150328	3.794474617	4.69797619	5.032643652	5.680307815	5.287617474	6.226801912	6.59240099	3.593913078	8.923600608	8.923600608	5.241355595
GSM1379923	0	8.538785318	5.783043868	11.20446301	8.831387567	7.761810743	8.15884614	6.266710843	9.738741849	8.723079881	6.844729408	7.093862852	3.88825277	6.68434524	7.866557555	5.546313116	7.066246531	5.321786714	8.890134445	6.361363853	6.180450402	6.657285276	6.438949829	6.589613696	4.383165086	5.111635995	6.406293204	6.822419155	5.930099086	9.134580525	5.759733236	3.518253702	8.719721157	8.719721157	5.505561288
GSM1379924	0	7.478814324	4.832110209	10.49512684	5.66602339	6.19110821	4.685359935	4.360479402	9.879031984	7.122224134	6.978101463	6.914227503	4.497957513	4.795513388	6.952298769	5.710172245	7.522108014	5.523911413	9.82711671	7.852374117	7.211743119	7.286824385	6.599013222	7.033236885	4.022517142	5.51488558	8.212007971	5.75643669	6.680747663	9.259476594	6.016414182	3.394117584	7.191806283	7.191806283	5.818092083
GSM1379925	0	9.464169367	7.058930836	11.76199237	7.359326446	7.80052014	6.759092605	8.285753818	10.40131467	9.932493919	8.627406322	6.367456945	3.747576762	5.516115702	5.580257536	4.430376495	5.585848931	4.892015866	7.813403499	7.483938111	6.009402711	6.153566016	5.10579491	6.068832068	3.434452072	4.362293431	6.270557668	5.481325011	5.33688117	6.416656411	5.288854441	2.924576171	7.238661541	7.238661541	4.713816774
GSM1379926	0	9.001737963	8.354676412	10.82826064	7.396235574	8.37788162	5.519104666	4.862345796	10.42839756	9.845143571	9.650602537	4.709349634	3.226467428	5.032643652	5.169257686	4.364145717	5.643728564	4.977860861	8.271273846	7.31703789	5.443100089	5.418983553	4.701658341	6.984949248	3.300691494	4.249362954	4.632046105	5.616806933	4.807108295	4.865983688	5.115376767	2.874793378	6.662724852	6.662724852	4.439081593
GSM1379927	0	9.066514122	7.540762056	10.35126903	6.75526747	8.31106696	5.450226115	6.279958845	10.06994742	10.43718496	9.182384833	6.059601425	3.385207748	6.416656411	6.185403363	4.530362756	6.233044231	5.049896636	8.244557538	8.259741994	5.963069328	5.825852071	5.187316926	6.920771544	3.924774764	4.303247551	5.312846807	5.508061921	5.248275803	5.293631724	5.59152738	3.45882951	7.030723555	7.030723555	4.810155063
GSM1379928	1	6.66036802	5.238846428	8.460704623	5.831307423	6.060993843	5.469412479	3.970638082	7.812100636	6.490230694	6.675335779	8.997494459	8.116662263	8.179357323	9.009639662	7.405969731	9.761384554	8.422975864	11.14357465	8.702330001	8.301082345	7.793921665	7.867808679	7.578727881	5.76623883	6.7279305	8.613941422	7.685995714	7.38734748	9.224018877	7.207309405	4.346397894	9.383029176	9.383029176	7.196728217
GSM1379929	1	6.590578758	5.037751912	9.630093971	6.142407051	6.287183434	4.829608467	4.676065146	9.650602537	6.932137648	7.142052984	8.983698313	6.465823793	10.80817465	10.68739268	6.741061136	8.767313337	7.499546247	10.79277146	8.425283702	8.243458189	7.119607435	7.093164183	7.093518726	5.486433298	6.251912939	7.946049341	7.450524312	7.095477337	8.548316695	7.279556156	4.049215406	10.81844171	10.81844171	6.793460282
GSM1379930	1	7.463325596	4.819698919	8.838936822	6.155878208	7.386588169	7.607530846	3.999871066	8.568744445	7.567256147	6.323657802	8.255337206	5.574451841	9.738741849	10.25589406	6.017913091	8.553951705	6.857213905	10.60576537	7.510007548	8.020039307	7.335935237	6.987184339	7.393036011	5.689270897	5.827583933	7.013977054	8.509036493	6.500436125	9.626049799	6.767674008	3.937527882	10.22317388	10.22317388	6.034928056
GSM1379931	1	8.059887121	4.969322215	8.539451551	6.190807859	6.168410783	5.958768023	4.062029714	9.791758491	6.450824823	6.870985384	8.168574992	5.324794493	7.467050699	6.467701439	5.924546512	8.457173989	6.592110692	10.37462292	7.91031121	8.315980052	7.773830448	6.305153403	7.088583069	5.271217782	6.281150354	8.253729834	6.626895726	6.984630035	9.157728023	6.856251249	3.21077705	7.878328335	7.878328335	6.45796217
GSM1379932	1	7.516936759	4.58171094	8.888583864	5.908172882	6.320367272	6.758415896	3.840411692	8.947189196	6.778850196	6.495472877	8.603844773	5.941448806	10.0346423	8.585539153	6.835821474	8.095048578	6.814944379	9.8639241	7.719333422	7.267324282	7.80010888	7.598864422	8.045110507	5.311094119	6.147906417	6.462764725	7.769254337	7.000026862	9.194486496	7.161146309	4.980574145	9.546526059	9.546526059	6.229174668
GSM1379933	1	8.128147276	6.462472189	9.055764211	6.855621828	8.204523874	7.740102935	3.952455125	9.440440228	7.560474425	6.853358696	7.043326957	3.961421477	8.432369827	9.87411107	5.736324238	7.963495077	5.916291807	10.02840133	7.051451337	7.210393255	7.300486378	6.721456425	6.597392532	4.593245696	5.458010446	7.276356743	6.774215458	6.009691312	9.82711671	6.588671851	3.626345729	10.63377348	10.63377348	6.030894831
GSM1379934	1	7.397669894	5.474491223	9.796757324	6.740405147	6.117240553	7.669770738	4.167133828	9.074801167	7.419272083	6.906089846	6.385225381	4.052586744	4.302629104	8.933902296	5.344248691	8.300051045	4.981163822	9.564637501	7.098120745	7.245014033	7.073222977	5.894118101	6.977118338	4.586653106	5.422929593	7.608722708	6.50642463	5.834758549	8.338787581	6.079807379	3.043812608	9.979280144	9.979280144	6.099708443
GSM1379935	1	6.819803364	4.525109719	8.670764525	6.265773775	5.657591925	7.071640888	4.394387092	9.45522571	6.670628487	7.746990875	8.745385413	5.446108744	10.80022665	8.735339693	7.221380276	7.517729013	7.181098401	10.19835779	7.950906495	7.763051414	7.36921071	7.079048806	7.681686609	5.500796724	5.95846999	7.379392775	9.362957809	6.960887137	7.886352501	7.249335528	4.872719322	9.784618089	9.784618089	6.399777184
GSM1379936	1	7.707180439	4.922094076	9.400294443	5.860324108	6.537068419	5.445789152	4.270570676	9.669948561	7.374465377	6.851824097	8.380173458	5.57876192	6.392012423	8.186342663	5.86705447	7.957088571	6.463386431	10.07843444	8.083039173	8.117674744	7.583280329	6.660670705	6.66739044	5.147670366	5.771572231	7.49017671	6.975227022	6.773553475	8.689479417	6.606871372	4.514075982	8.634585184	8.634585184	6.074028464
GSM1379937	1	6.838366267	4.971213321	8.599216891	5.97598879	6.164887475	6.312213304	4.218799424	9.331251377	6.876126576	7.396991971	8.188375143	5.709860601	8.403830507	7.660281646	6.708873572	9.002511359	6.925949726	10.40131467	8.251518688	8.203438692	7.589646736	6.758415896	7.222041828	5.048640093	6.410249638	7.475511029	7.667834439	7.171785664	8.773401338	6.778850196	4.987434401	8.631128744	8.631128744	6.440763383
GSM1379938	1	6.436707184	5.334447426	11.64534898	8.056551842	7.167820924	7.978405331	6.759092605	8.609925473	8.206166972	7.224397686	8.441439344	8.254292254	11.42732347	9.543199234	7.588166122	9.321362959	8.733195268	10.51214159	8.582264813	7.950449666	7.813403499	6.887045106	7.049484742	5.05843682	6.280256375	8.361515469	7.780414524	7.344849104	9.033093697	6.68434524	3.387895633	10.20669302	10.20669302	6.895979052
GSM1379939	1	7.648146224	5.421691144	9.015027844	5.949073589	6.120389807	7.13786235	4.307079984	8.125702041	7.142715635	7.34522211	8.236576773	6.091376145	11.15542488	9.295493653	6.141494437	6.767674008	6.685316364	10.06119039	6.816879717	6.64597283	7.058930836	7.732529257	8.083039173	5.687878514	5.631005078	7.973848542	7.347008205	6.544173614	9.700759526	6.037821327	4.860511587	9.620072687	9.620072687	6.338936333
GSM1379940	1	8.281839145	5.561431644	10.8453511	6.592981697	6.650347017	7.74128802	6.408159898	9.678323788	7.353514225	6.72599807	8.649303166	5.698029199	9.31559799	8.797204954	6.01025988	8.361515469	7.161146309	10.39067452	7.689184404	8.052662838	7.335935237	5.961593119	6.589903266	5.17655468	6.025633066	7.714890575	7.079048806	7.026348742	9.441761836	6.959325855	3.923889769	9.10267804	9.10267804	6.4072148
GSM1379941	1	9.529849128	6.797977036	10.21268441	5.223122651	7.620576021	7.391197869	3.790411931	9.479499995	7.357106838	7.950449666	8.866979948	6.096412689	10.88607435	10.43411111	7.342662138	8.178849987	6.906398188	10.33503632	6.206068009	7.878526304	6.327294253	7.346669077	6.688383642	5.994066179	5.916579541	7.539994802	7.302997452	7.086637898	8.806128184	7.187721349	5.022769023	10.25708915	10.25708915	6.597733569
GSM1379942	1	7.313534071	4.960356477	8.620615064	6.235121413	6.281433096	5.708418742	3.958089114	8.700771852	7.055703792	6.85818102	8.626672378	6.161717035	10.40411488	8.600574705	6.831918533	7.408139132	6.674716547	10.19139327	8.003092113	8.160905159	8.022837327	6.738102316	7.775880532	5.113232949	5.328489341	6.423135879	7.371277857	6.697555351	6.16784464	7.705232549	4.953007183	8.995279062	8.995279062	6.413598602
GSM1379943	1	6.602559836	4.257712521	9.503591878	5.737764272	6.759718051	6.642843515	3.948263418	9.240311405	6.695688392	6.675975872	9.186480783	6.622852531	8.33258276	8.823766909	6.573999145	8.864613981	7.692415926	10.79636576	8.244557538	7.426767846	7.549665369	7.974711817	6.336522371	5.268866456	6.595552898	6.110785467	9.033093697	7.312813316	9.597186548	6.425871822	3.83836177	8.914165782	8.914165782	6.81110927
GSM1379944	1	7.588885419	6.285139287	9.029303266	7.306060119	6.599013222	6.9178966	3.983812251	8.307664368	7.909454644	7.040715189	8.513541588	5.615342515	10.79277146	7.432854719	7.648146224	9.227354598	7.571459272	10.66267794	8.006926478	7.556287275	7.596141503	6.653430647	7.94693738	5.777962598	5.61908208	6.90449942	7.465173326	6.855621828	9.331251377	6.633157442	4.059143839	8.144876061	8.144876061	6.658227206
GSM1379945	1	7.105290064	4.626103108	8.861447212	5.767769103	5.85586348	6.350211265	5.485551554	10.13211197	6.769348358	6.958672746	7.975170915	5.38409306	7.558556569	7.964398457	5.806786528	8.301640199	6.625360119	10.05894627	8.139647088	7.569545107	7.416765765	6.320061866	7.086332023	5.031099047	5.99352393	7.871258252	7.34522211	6.746484071	9.454000162	6.522614956	3.524451573	8.267129459	8.267129459	6.227374375
GSM1379946	1	6.256648038	6.071434074	7.989283534	8.122636333	6.4805513	6.699518865	3.935710013	7.043019709	7.127663298	6.27113218	8.636335493	6.335598905	10.83675159	8.483566299	8.349667488	9.547156098	7.866557555	10.88149235	7.955328393	7.55554217	7.693568359	8.056551842	8.927215928	5.555308702	6.387389727	6.873519088	9.268188492	7.083011391	9.118831342	6.412333009	5.46224135	8.945178502	8.945178502	6.861759469
GSM1379947	1	8.11614657	5.526354871	8.257534355	6.49952129	6.598380662	6.967739633	3.661682476	10.53626593	6.666780205	6.808586507	8.27284539	5.659623042	9.117888053	9.289726732	5.966886108	7.751525191	5.895006636	10.39863069	7.195358986	7.525887506	7.685995714	7.180784624	7.109597976	4.947671208	5.831008782	7.748289063	7.593009327	6.585689689	9.539015898	7.301288413	4.911895683	9.64852823	9.64852823	6.397276018
GSM1379948	1	5.876086148	4.557241755	8.395340766	5.446108744	6.678197858	4.545613493	4.137626514	8.043198446	6.276353576	6.71327422	9.452786955	8.279528508	9.674191456	7.735274862	7.908035402	9.783897406	8.822193961	11.03719224	9.705032103	7.917246029	8.248364588	8.455362369	7.173453408	5.201210842	6.404417209	7.13127864	9.168022777	7.756505185	8.763609587	7.133868241	5.363775883	8.57805659	8.57805659	7.224744239
GSM1379949	1	6.566708914	4.681339929	10.03860496	5.901170471	6.699839739	6.321270485	4.221759953	8.183619917	7.081410668	6.361363853	8.353505538	5.057179011	9.342036813	9.471818401	6.478996417	9.021366119	6.870045447	10.2633903	8.067681861	6.992174109	8.239191803	7.550820978	7.419995415	5.043312347	5.844681068	6.513485211	7.351070461	6.844079338	9.173200927	6.299952817	4.532490772	10.46805927	10.46805927	6.403180407
GSM1379950	1	6.435750491	4.311196201	8.292120448	5.159263497	6.606272128	4.455093847	3.794197041	9.204951962	6.884590272	6.961551491	9.667160717	7.570680865	11.54304518	9.277022971	8.933086084	9.719568737	8.135566088	11.04822592	8.388822075	8.894280368	8.142197746	8.147139781	8.178849987	5.590616637	5.908759821	7.110251946	8.451797638	7.873387866	7.668968474	7.109253236	6.398849005	9.555838766	9.555838766	7.283380197
GSM1379951	1	5.66602339	4.495485551	9.303334657	5.72034333	6.402277542	5.464290583	4.385850758	6.860484013	6.842470513	6.347695276	9.350241634	8.538211013	9.643874262	10.29388479	8.475603824	9.942204403	8.703762643	11.08136619	8.670764525	8.682231425	7.983374378	8.333087126	7.859117832	5.453808777	6.201311696	7.813403499	7.863934745	7.940290561	7.527730529	7.35567206	3.845401439	10.856723	10.856723	7.389393586
GSM1379952	1	6.164887475	4.847295278	8.651428102	5.355277302	9.03657514	5.535709943	3.903204764	7.257572422	6.617213575	6.34617029	9.759985444	9.15670014	8.422975864	9.925460684	6.678839247	9.780636726	8.706661808	11.42732347	10.41231789	7.233082001	7.92351117	9.070214111	7.281270329	5.874965145	5.849121839	7.428129233	8.864613981	7.557791838	9.04207532	7.087305718	7.107624061	10.35792964	10.35792964	7.087898007
GSM1379953	1	5.250732093	4.530362756	9.287475281	4.982085764	6.997779165	5.423892601	4.564926334	8.543166657	6.886124294	6.563308059	8.99486394	6.826900234	9.474278855	8.476215561	7.48758855	8.90537439	7.385881097	10.74235489	7.943782491	7.741712154	8.194045216	8.46545568	7.781676579	5.326321322	6.014429696	7.300141428	7.610511678	7.560838043	8.54504865	6.6553456	5.075844939	8.923600608	8.923600608	6.748044032
GSM1379954	1	6.986565275	5.589150006	9.8688964	6.36775751	6.642174025	7.496227512	5.824680991	8.933902296	7.584779845	6.868132485	8.18249367	4.546499784	6.086437885	7.646962629	6.842470513	8.939870139	7.337376638	10.42588821	7.509258831	7.687599468	8.008736501	6.229769109	7.150360613	5.147670366	6.416656411	7.55554217	8.053600565	6.929801083	9.151654611	6.518921683	4.276018706	7.874859297	7.874859297	6.531482633
GSM1379955	1	6.284222858	5.074654317	10.08882926	5.301917786	6.889421635	6.522301022	3.213838491	8.407425861	6.558155465	6.030319732	8.913809558	6.05678438	7.676680131	7.581771933	6.977767499	8.277276356	7.286824385	10.26594985	8.352969151	7.103052588	7.22171706	8.537009151	6.977118338	5.042678042	6.242004944	6.68434524	8.229056038	7.170493118	8.620615064	6.701408764	5.086301462	8.065569314	8.065569314	7.030892821
GSM1379956	1	7.749140973	5.041170046	7.938986011	5.561131349	6.626268505	6.69351176	3.883771795	7.399866313	7.061958005	6.581587186	8.621994707	5.992145889	10.44558818	6.884269172	6.504873405	8.078795172	7.915512194	10.26842333	8.325493756	7.761427841	8.153244589	7.415657313	7.815451255	5.848237575	5.972358994	7.720520283	7.81881866	7.114586071	9.725640622	6.844729408	5.217368895	9.274322127	9.274322127	6.801144078
GSM1379957	1	6.980661982	5.495454249	10.29388479	5.775613882	6.680443336	7.578727881	5.411803719	7.518794076	6.296035953	6.612103822	8.501804348	5.018498948	8.387084311	7.102738858	6.693850693	8.016280172	7.540762056	10.47766477	8.113651321	8.213055322	6.931791111	5.94320947	6.89270236	5.378899908	6.623794249	8.165550748	7.728521923	7.035203637	9.590577175	7.901482293	4.592371067	7.955103479	7.955103479	6.96414757
GSM1379958	1	7.424216143	6.146719914	10.19598054	6.225888888	6.716049506	7.017558472	4.958819465	8.862271301	7.737666457	6.282355557	8.224197624	5.294872849	6.031796872	7.685185375	6.50012176	8.004494562	6.3914247	10.07608212	7.859117832	7.568771547	7.756919641	6.432344197	7.30506375	5.235589324	5.666324821	7.444509534	7.22171706	6.577127162	8.575156423	6.598680459	4.349956212	8.633192487	8.633192487	6.45952687
GSM1379959	1	7.920352042	5.501681151	12.3868328	5.088696821	6.698190329	5.360126749	6.504317764	6.624434192	10.6454963	7.7734346	8.07402065	5.307433618	12.08638639	6.845058211	6.4053505	8.331544737	7.885054495	10.38009499	7.344121675	7.066246531	7.82505274	7.86092072	7.46481212	5.629429695	5.621482437	9.431979905	8.7404836	6.45889365	8.595260462	7.172114506	3.830971115	7.95644372	7.95644372	6.916212174
GSM1379960	1	7.519526331	4.696122758	10.32692866	4.892015866	5.760642529	6.161137636	4.397461307	7.919045623	7.055372281	6.087876194	7.787778896	4.484380234	8.521398501	6.747430918	6.535512722	8.085450692	6.276938072	10.04698311	7.003855317	7.051118883	7.674038738	6.71263467	6.432643213	5.17777775	6.09432082	7.231073394	7.283747936	6.946534698	8.950597557	6.83678153	4.334181095	7.178895317	7.178895317	6.640236591
GSM1379961	0	8.024772452	6.050616476	11.09274763	6.709176288	7.391197869	8.869319734	6.784258316	9.535001336	7.192617458	6.044117801	6.739078334	3.582473697	4.045325164	7.609451396	5.148002202	7.43724908	5.680307815	9.135500084	7.23441691	6.887045106	8.048865648	4.88804332	5.399098344	3.601272361	5.136727822	7.299388782	6.524531097	5.570923832	9.035762377	6.202798149	3.212282816	8.409490859	8.409490859	5.951330819
GSM1379962	0	9.47703737	5.062687034	11.10962112	7.094534719	8.210959792	7.421379623	5.407386439	9.650602537	8.659837317	7.929481896	8.946366369	4.981163822	5.750716404	7.726861013	4.729612513	8.460704623	7.002239749	10.42063818	8.582933702	6.759718051	7.405969731	7.02019778	6.023526455	3.759297496	5.264045584	6.386768109	7.143991326	6.453032548	7.927334667	5.995520878	4.124395196	8.44858236	8.44858236	6.433915053
GSM1379963	1	8.160391916	6.420650653	10.66623792	6.787763697	7.573748341	7.154470532	5.626468255	7.898910722	8.194045216	7.787409668	6.71573213	3.774761619	10.738593	7.503241707	5.498180052	5.980911208	5.6244103	8.780026288	6.562275695	6.593629856	7.301288413	6.039575027	6.919486923	5.526644767	5.025746964	7.804210128	6.848199053	5.936245947	9.611168217	5.600225753	3.680694205	7.999137361	7.999137361	5.279934702
GSM1379964	1	7.915931975	4.745659089	10.52709439	5.858016798	6.027690464	6.369878411	4.582014732	8.090786986	7.08822178	6.667065344	8.640954261	5.778602175	8.016280172	8.524985594	6.240754157	8.159918326	7.936867705	9.976232674	8.095048578	7.084952467	7.545552525	7.581052851	6.49358233	4.986200148	6.165445359	7.293785947	6.533041765	6.925637429	10.14382426	6.994133905	4.020405969	8.985780439	8.985780439	6.159701052
GSM1379965	0	9.3372259	7.630752549	11.55268085	7.885928144	8.294899886	8.573223217	5.506191645	9.87741113	7.980251886	7.769691021	6.338001913	3.742031719	8.171125661	8.223660927	4.548908632	6.179865572	5.794386125	8.289330729	6.476808986	6.434862925	6.20401649	5.955469625	5.590327919	4.496756048	5.351816153	5.973853541	6.797977036	5.786292386	9.249768656	5.821718796	3.780173479	10.2138566	10.2138566	5.29152518
GSM1379966	0	7.817536538	8.278982158	11.21720555	7.63836231	7.604893735	6.96903675	5.848237575	9.354891745	9.104039089	8.278375741	5.229642739	3.785748385	7.518421565	9.366510532	4.982719522	6.864968281	5.00865697	8.473828457	5.852650643	5.752468949	4.720052426	5.405275176	6.704661126	3.515031332	4.53831757	3.94379385	6.57527631	4.871450706	7.481408704	5.657591925	3.069029821	10.24495853	10.24495853	4.615038298
GSM1379967	0	10.05704633	5.958768023	12.03818338	7.332115659	8.892645801	8.168112624	6.931442321	8.231785443	8.207760201	7.171785664	7.172811499	3.319809006	7.850666783	6.975531076	4.893859323	6.592693349	6.151175551	8.868551086	6.099401381	5.606693697	6.169831642	7.038772117	5.542421061	3.844527011	5.400640048	5.61908208	5.738670027	6.399456548	8.596597312	5.248904307	3.922968905	8.490135671	8.490135671	5.560843262
GSM1379968	0	10.00788087	8.119628097	10.58622696	7.912525404	8.60585984	6.285734732	4.833569669	9.692201429	7.461106998	8.322166768	6.400072081	3.139569197	5.305583431	8.082116201	5.019428625	6.177827791	4.910040882	9.026684979	6.306739493	6.045592797	6.431396203	6.190807859	5.772154352	3.816322575	4.59688594	6.930119209	5.75643669	6.029194598	8.640954261	5.659350886	3.312176265	9.14074836	9.14074836	5.559996869
GSM1379969	0	9.77769041	9.547156098	11.42732347	8.35246945	8.305997455	7.515489038	6.241387001	8.746057553	7.632319006	8.045559141	5.418707198	4.26680964	10.40969035	7.263862748	5.265289092	6.619722689	5.850624459	9.206012622	6.138467583	5.524791611	5.709860601	6.668037866	5.94764033	4.042317722	4.615987212	5.298221427	7.254124864	5.579945397	8.162473763	6.061889756	3.777136955	8.763969388	8.763969388	5.143470824
GSM1379970	0	8.921691914	6.656653739	11.13802081	7.810904644	8.078795172	8.762898878	6.063036267	10.05704633	7.903669536	7.170170479	5.935656919	3.775630671	4.799172639	8.822193961	5.126624542	7.259654333	5.808721797	8.455999803	6.246796752	6.506720503	6.221453112	5.51699043	5.25507655	3.672049017	4.901183292	6.763263505	5.883321106	5.822007743	8.528109192	5.737175334	2.918324812	10.08773922	10.08773922	5.438000577
GSM1379971	0	8.48800688	4.97149349	10.71195577	5.803849836	6.982993375	4.903938512	4.066264604	9.216544848	6.825622173	6.867814602	6.969714802	4.02431362	4.183253466	8.278982158	6.298715388	7.971160864	5.942331747	9.87411107	7.670175978	7.227753824	7.609824251	7.000684659	6.177226587	4.70506029	5.75643669	7.992560165	5.778285774	7.023766498	8.916920314	6.606871372	3.11249073	8.632563502	8.632563502	6.012338425
GSM1379972	0	7.833675161	5.705825922	11.34042004	7.419995415	7.267633022	7.81962965	7.166512153	9.867207221	7.738067842	7.429969014	6.888050143	4.253446509	4.352055761	8.746057553	5.355277302	7.856195599	5.773591915	9.180411208	7.319769042	6.858497065	6.486503558	5.652802371	5.664024676	3.771798369	4.974232878	6.068832068	6.614677625	5.936542005	9.059334383	5.42018421	3.225012447	10.05397852	10.05397852	5.882477832
GSM1379973	0	7.837902645	4.967491345	11.08136619	6.157382688	6.185403363	4.760228755	4.371472377	8.999263683	7.161492517	7.582523091	8.036001293	5.157360315	9.776193298	5.051444616	6.455762409	7.682414096	6.445483567	9.967860096	7.226078315	6.31007718	7.352834225	8.370990767	7.832831958	4.853498896	5.720628653	6.816561127	6.755567586	6.781993441	8.718672775	6.450177121	4.735831374	6.433757054	6.433757054	6.327914202
GSM1379974	0	9.033969527	6.739383702	11.14357465	7.35638443	7.606049805	6.728262648	7.40632796	10.33804701	9.657327777	9.581038932	5.029951763	3.403344164	5.97862423	5.60905439	4.595682117	6.120967017	5.183625296	8.647903422	6.718565601	6.099401381	5.518192485	5.84294422	6.787439364	3.354197633	4.798857936	5.986723218	5.954607117	5.234338475	5.523308489	7.312452591	3.093861107	7.076618346	7.076618346	5.179379589
GSM1379975	0	8.662593592	4.911268972	9.436683191	6.788094905	8.51662411	7.684766198	3.955712766	9.732905504	8.003560833	7.198109148	7.775017431	4.406986418	4.030715512	7.060930178	5.661682979	8.156855435	5.920936048	10.14825425	6.426811102	6.925637429	6.852445513	7.214779676	5.890628555	4.933384676	5.431346984	7.536688143	7.101081176	6.34191829	8.395868519	5.556195635	3.871588705	7.587231491	7.587231491	6.198971577
GSM1379976	0	8.427094606	8.791281387	11.56378904	8.677965536	7.072587845	7.912091744	8.491661501	9.568771976	7.801814778	7.929924757	4.927826349	3.589483586	6.647212453	8.032164592	4.782572708	7.139838513	5.696925425	8.344506778	6.315912077	6.268212389	5.759430362	4.914062716	6.220573968	3.705292149	4.511275322	4.039019415	5.998998447	4.844551083	8.226387378	6.234199954	2.636336388	9.009166317	9.009166317	5.68294194
GSM1379977	0	8.689479417	6.471527398	12.06175189	7.516936759	7.853669351	7.181098401	7.724032084	9.123653634	8.544466713	7.183698222	6.196952084	3.920957352	4.941612617	9.049436564	4.758957431	7.799298951	5.16446326	8.829179633	6.519520593	6.522929334	6.280256375	6.918224969	5.299137249	4.249924133	5.38681699	4.801858788	6.530825144	5.680617189	9.52051634	4.657532217	2.999699056	9.670699728	9.670699728	5.34850655
GSM1379978	0	8.355172822	7.69074614	11.26978628	7.840345062	7.386238205	8.187883136	6.461005063	9.604021273	7.152722043	8.379621971	6.201619683	3.877889864	6.829406053	8.690220563	5.027834167	6.950388539	5.666876454	9.346760884	7.183042329	6.224077511	6.622852531	5.347281746	5.897400293	4.223216573	4.805599945	5.366513615	6.90449942	5.438000577	8.970081376	5.850624459	3.275821036	9.375077599	9.375077599	5.368955163
GSM1379979	0	9.242445599	5.862960963	10.85889819	7.856195599	7.295237966	8.100964519	5.644368532	9.743384005	7.910769392	6.411470769	6.584418186	3.425586525	5.772996015	9.548565989	4.662085664	7.164828665	5.522082117	9.024069279	6.872549814	6.195800304	7.783735592	6.078954902	5.724215878	4.044437996	5.206062317	6.416656411	6.743281444	5.512527714	8.421171046	5.72617583	2.98286425	10.47633569	10.47633569	5.41241796
GSM1379980	0	8.587491409	4.636098322	9.95567958	5.991884826	7.189680886	4.677883973	3.98895146	8.659837317	8.083039173	6.034087586	6.364773253	3.819888899	3.734876213	5.219473163	5.223122651	7.222041828	5.619688562	9.383611638	7.259982167	6.843449255	7.429204315	6.421864752	5.791580945	4.494564144	5.179968054	7.307438648	6.124568371	6.242315357	8.317727552	5.66311825	2.485373105	6.402112303	6.402112303	5.932182175
GSM1379981	0	7.127663298	5.517883153	10.00384413	7.209398353	6.920771544	7.415286928	5.092342769	11.0642058	6.888746915	9.319077785	7.665478584	5.751007126	8.6887603	6.214560828	6.19549023	7.557791838	7.439754036	9.851951734	7.093518726	7.627499347	6.807958925	6.375917788	5.775304052	4.506629523	5.289429106	5.671583483	7.063641819	6.627512664	5.949328868	6.500748581	4.317419194	6.592255841	6.592255841	5.892946325
GSM1379982	0	6.749278944	4.747824596	8.481078106	5.988731137	5.772996015	7.031544367	4.824035513	9.574142094	6.597392532	7.527730529	8.971704519	5.57876192	10.8681572	8.759938737	7.40632796	7.511496109	7.267979764	10.16005856	7.765553071	7.928611879	7.486144251	6.938924773	7.541866681	5.598118308	6.028250201	7.205970544	9.015027844	7.021537402	7.902817752	7.261070627	5.259402073	9.354291159	9.354291159	6.334032146
GSM1379983	0	8.488652117	5.177165645	11.44419575	6.67690875	7.397342674	6.517312317	5.923946319	10.00384413	8.379621971	7.000026862	6.368338949	4.00470705	4.351758295	4.4807566	5.030236565	7.332468127	5.715342437	8.926422255	6.07434103	6.563624807	6.47778239	6.562971452	5.36707225	3.897316689	5.464905399	5.965729761	6.229769109	6.01025988	8.50000749	5.760642529	2.709423326	6.039170488	6.039170488	5.69105336
GSM1379984	0	6.7483334	5.245812515	9.093767396	7.031544367	6.426194902	7.665478584	4.18500478	8.98791739	6.742684917	6.528862969	8.682940574	6.05524821	11.01040913	6.010892945	6.828127635	8.571264481	7.994848967	10.89482351	8.433603399	7.28615301	7.376247083	7.117237553	6.817208862	5.441313368	5.918622903	6.50237845	8.257534355	6.324905997	9.141222566	6.456374464	5.990125013	7.154303969	7.154303969	6.75526747
GSM1379985	0	10.26074426	8.203438692	10.49229416	7.982902198	8.719362979	7.412092855	5.928639163	9.200884523	9.535001336	8.68722193	6.017913091	4.577940112	6.238695066	7.876389828	4.917709347	7.029611814	5.578428838	9.59455268	7.895376795	6.344043817	5.905852041	5.826132082	6.704029527	3.710316921	4.457571631	5.926309419	5.820183497	5.446108744	6.055534238	5.285737903	3.541603549	8.717565364	8.717565364	5.082882143
GSM1379986	0	7.946049341	6.129215379	9.647822882	7.553976261	6.154427738	8.660480072	4.062966403	9.085103389	7.446038639	6.423765058	6.434561601	4.11941423	5.328779319	7.474066026	5.419570073	7.521378873	6.625360119	9.304532174	6.785523237	5.938258604	6.339208371	5.44964647	5.243120769	3.756683444	4.932116469	7.12699987	7.341275498	5.702355075	7.988401171	6.549602725	2.959205416	8.943530374	8.943530374	5.466353047
GSM1379987	0	8.680768872	7.645038162	10.64202635	7.79970789	8.398203087	8.68722193	4.017757868	8.887689244	8.198640178	7.360705713	5.620558925	3.597400656	4.990185501	9.533739998	5.097191905	7.107283493	5.670743478	8.816906507	5.937110368	6.149712548	6.652509718	7.153781928	5.443727203	4.310586569	4.778604089	7.094842329	5.818690421	5.502302959	9.088018832	6.286621356	3.289408557	10.22804343	10.22804343	5.875499499
GSM1379988	0	8.152705877	6.39455321	11.42732347	7.475869163	7.225719639	8.454286138	5.494866696	10.95800318	8.772703219	8.013449638	6.748978899	3.860631948	6.088153593	9.39178704	5.10608577	7.461106998	5.24703731	9.535001336	7.271945907	6.429268612	6.119219538	6.04529251	5.70095409	3.60187438	4.912487075	6.012939948	7.215460924	5.73749838	9.110898323	5.584717795	2.760245402	10.34729265	10.34729265	5.484654741
GSM1379989	0	9.365262097	6.131316693	10.42588821	7.300486378	8.303749312	8.376719647	3.617226864	10.03860496	7.224744239	6.117775711	6.248885617	3.434452072	6.996126841	6.746484071	4.231519676	6.933754116	5.377982882	9.024069279	5.600827495	5.99352393	7.006768775	6.082995955	6.175398761	4.789278244	4.849757485	7.244658594	6.341613405	5.225917448	9.07205629	7.377667575	3.051558493	7.635878668	7.635878668	5.72884071
GSM1379990	0	8.795752171	5.766854341	10.24608561	6.877443994	7.621715342	6.80633362	3.6254127	10.0180509	8.274514219	8.123133422	7.2781381	4.308858898	6.892029535	7.468909337	5.324159515	7.122545374	5.314450459	9.275979864	5.947926353	6.619411212	5.70695265	7.251685444	5.68294194	4.510633096	5.053526201	7.521745524	6.317986184	6.048536376	6.061590974	5.753913401	4.063868599	8.3162619	8.3162619	5.973232367
GSM1379991	0	7.857036264	5.202723948	10.05097545	6.896320238	7.593828812	7.281929524	4.55136594	9.59857073	7.117905219	7.246338176	8.314360075	5.383769281	9.026684979	8.802341846	6.156496505	7.830719646	6.879359411	10.04268608	7.63375291	7.111964238	6.140921624	6.147311492	6.75401827	4.979650474	5.446391729	6.668695572	7.767217527	5.998117506	7.856195599	6.752738295	5.262184623	9.610507784	9.610507784	6.379638889
GSM1379992	1	6.752416537	4.912813984	9.595906837	6.489610339	7.384073455	8.106745798	5.06513612	10.30879784	6.750828673	6.181044982	7.294126065	4.530953209	4.33959768	10.06350698	5.734082541	8.492883197	6.106938796	10.27383151	7.442694262	7.665091323	7.798862221	6.401341575	6.496069609	5.307131894	6.248885617	8.263015259	7.073849953	5.951043085	9.298948371	6.792231042	3.098739246	10.699234	10.699234	7.156772532
GSM1379993	1	5.882771281	6.115751087	8.248364588	6.372015198	7.519526331	5.951605343	3.898837407	8.617277187	6.009956749	5.659350886	7.704409948	5.789130123	4.464377288	9.324637883	7.124276516	10.03860496	8.559634897	10.62206169	8.533843786	7.604518293	7.652476152	7.299031214	6.977428078	5.260300876	6.560755174	7.980251886	9.030315579	7.007414492	7.987963512	8.264108909	2.970142007	10.02523415	10.02523415	7.777598205
GSM1379994	1	7.877645092	5.508340825	8.779250632	6.216699486	6.60345095	6.64691378	4.909080824	10.00200444	6.435750491	7.011007423	8.750299539	5.942609731	7.199450148	8.822193961	7.130587601	8.538211013	7.352507151	10.61557289	8.012041816	8.573878471	7.047248172	6.659420575	6.698508709	5.601760811	6.407511838	7.696773809	7.620576021	7.071337869	9.022275657	8.731024121	4.832671837	9.481418761	9.481418761	6.987858817
GSM1379995	1	6.566377811	5.449065254	8.966648256	5.840605508	6.183943049	5.753913401	5.154070063	9.466871751	5.862671342	7.234742291	7.460726189	5.272181219	5.29152518	7.257895299	6.148498366	8.100477616	6.398849005	9.841779184	8.756152511	8.15884614	7.538170618	6.206349613	7.403533635	4.201787947	6.064761166	7.674038738	7.180784624	7.104314872	5.408886191	7.466695832	3.320091822	8.99098501	8.99098501	6.546740063
GSM1379996	1	7.166838373	4.664647968	9.133644852	6.136385596	8.946366369	5.446391729	4.030715512	8.832882333	6.719201713	6.71327422	8.087461235	6.025916365	6.676292895	7.418928615	5.987288693	8.399884364	6.56794915	10.24150088	8.991421283	7.259654333	6.696639434	6.850798104	6.989196172	4.469740917	5.549681996	7.384438902	7.606049805	6.066535117	9.144115043	6.509460423	3.559931201	8.56187369	8.56187369	6.105192842
GSM1379997	1	7.203554963	4.681642262	8.406288305	6.096118933	6.487775234	6.711071622	3.610017927	8.75686453	6.805354548	7.213775694	8.568744445	5.611727464	7.23745384	8.993096315	6.665766311	9.04667545	7.571459272	10.83255393	8.153244589	7.661053774	7.568402302	7.181410183	7.368859833	5.144093903	6.342520552	7.764341792	7.194650625	6.87642137	9.597186548	6.966794472	4.25051081	9.370544303	9.370544303	6.891365675
GSM1379998	1	7.248358317	4.923324544	9.503591878	6.248885617	6.600917276	6.347695276	3.86182619	9.382446714	7.36666779	6.292710557	7.357451652	4.519541189	4.346992011	8.802341846	6.030602286	8.019617254	6.015872013	9.886041572	7.741712154	7.186390513	7.331779958	6.988515245	6.743618482	4.943095021	6.138173824	8.26468249	7.106327366	6.544467144	8.987086383	7.139504469	3.155285157	9.685929639	9.685929639	7.071640888
GSM1379999	1	7.119286884	5.61322084	10.85889819	6.068235033	6.797071096	5.924247996	5.241648367	9.801635541	7.43176849	7.172472271	8.699328289	5.598717453	11.5005407	10.41525498	7.369569052	8.655511043	6.906398188	10.35644513	8.403238883	7.665478584	6.780081065	7.404925532	7.251335123	4.746915375	5.160197161	6.336230274	7.994401496	6.784577408	8.709458185	6.510096552	4.795513388	10.72484679	10.72484679	6.276654613
GSM1380000	1	6.157950959	4.943095021	8.899691749	6.479599708	6.72273224	6.348034249	4.121801787	8.29047887	7.001297235	6.928204861	8.983698313	6.719201713	10.62206169	9.091920477	6.99905286	9.110898323	7.755649617	10.83255393	8.37032048	7.807112611	7.333473323	7.911218287	7.401379607	5.41393843	6.369582562	7.157783677	8.090302371	7.100755487	8.942359736	6.564594412	5.143177108	9.772516503	9.772516503	6.795459317
GSM1380001	1	6.462200432	5.082294765	9.064706706	6.688722155	6.597733569	6.943085065	4.537117758	9.252083548	6.869732441	6.769348358	9.035762377	7.067217551	8.779250632	9.889718939	6.894705931	9.020400888	7.582143582	10.85889819	8.492279527	8.240725413	7.296221577	7.643492261	7.379055077	5.541521574	6.463386431	7.919492524	8.641619174	7.174102935	9.296628656	7.41601521	4.589988361	10.49095713	10.49095713	6.96414757
GSM1380002	1	6.900268264	4.901183292	8.169626957	6.111933507	6.391716688	6.053821612	3.542207071	9.238091023	6.4649047	6.630946588	8.463055037	5.829351813	9.047633941	10.83675159	6.330411476	8.231220862	6.96250269	10.45509446	8.168112624	7.551568921	7.784985664	7.704822366	7.370257251	5.161057201	5.966886108	6.998719955	7.729389656	6.557830752	8.818390666	7.212427515	5.876375586	10.92596049	10.92596049	6.393611352
GSM1380003	1	6.822419155	4.562774359	9.081318493	5.641343084	5.905264611	6.521991977	4.66648347	8.980985165	6.57432624	7.01202197	9.359445119	7.943782491	11.44419575	8.644338191	8.034586496	8.973299699	7.756073379	10.79636576	9.062930274	8.713014006	7.550820978	7.008665493	8.079286809	5.703523945	5.919773017	7.122224134	8.358662377	7.358508242	8.542521375	7.319062935	6.838034058	9.352010312	9.352010312	6.767674008
GSM1380004	1	5.819597318	5.17777775	9.403975296	6.34617029	6.180450402	6.497042008	4.053188867	9.252083548	6.86942023	6.713597648	7.933368772	4.657807515	7.072587845	9.493483981	6.261373427	8.766552558	6.804385443	10.42588821	7.28407803	7.438716618	7.482773252	7.55554217	7.326524081	5.071651981	6.164044845	7.39800038	8.315418743	6.809863164	9.774648544	6.460109671	3.775048653	9.64852823	9.64852823	6.543864133
GSM1380005	1	7.269772812	5.172314584	10.22927611	7.130288883	6.461301577	6.329771363	5.539740602	7.813403499	8.094604258	6.633452732	8.241234592	5.480987475	9.162834566	9.645286681	7.025369595	8.806128184	6.804385443	10.44558818	8.083039173	7.526593839	9.358262616	7.44560871	7.82373725	5.236465291	6.35230841	6.671199887	7.948713666	6.829081892	9.780636726	6.021779641	3.927201205	9.63789837	9.63789837	6.556861217
GSM1380006	1	7.953508714	4.786496487	9.949938931	5.72034333	6.138467583	7.184685589	5.199339901	9.59857073	6.872877866	7.483570535	8.444548844	5.608461785	8.746057553	9.566074495	6.189897333	8.159377572	7.678913123	10.25828423	7.788167171	7.844621651	6.907300754	7.507761536	6.706603837	6.067398154	6.521991977	7.594549011	8.072072856	7.226428279	9.724138281	6.325202435	3.996273123	9.718871529	9.718871529	6.380246215
GSM1380007	1	9.076756239	5.428689898	10.9283963	6.765200189	7.839159249	8.505458611	5.358626814	11.43568065	7.732529257	8.990548737	7.024074753	4.252878661	5.107330565	4.069809482	4.880273648	7.348891315	5.611157611	9.049436564	6.277548773	6.248594243	6.506720503	6.80826703	5.843237812	4.428611287	5.426875434	7.062607992	6.666102263	6.250703936	6.790631673	5.370745333	3.601586379	6.168554235	6.168554235	5.733175608
GSM1380008	0	9.541743316	8.064871845	12.2698934	7.504017333	7.569545107	8.938034697	4.008901995	9.126711125	7.024706918	7.232132551	5.469958867	3.124373272	4.785337198	7.457854476	4.406364204	5.366513615	5.483466424	7.989739137	5.627383817	5.837713997	5.94764033	5.4604444	5.74837541	3.755868606	4.363855005	7.421705117	5.721553029	5.629752184	9.407692977	6.291480558	3.66110136	8.396142283	8.396142283	5.570082784
GSM1380009	1	7.558154627	4.761168153	9.544496697	5.925742962	6.222338671	6.432013308	5.034116261	9.555160594	6.45114024	6.881672328	8.581031505	5.759430362	11.08136619	7.513295936	7.103052588	8.323326822	7.163193639	10.2174596	8.399313793	7.666642096	7.530421349	6.913295969	7.107283493	4.949824833	5.944084821	7.277416265	8.157370609	7.368161737	8.979318887	6.704979478	6.35230841	8.532922254	8.532922254	6.704029527
GSM1380010	0	8.089801763	7.531841055	11.93276544	6.919486923	6.624434192	9.010474054	6.031186504	10.55768385	9.006939834	8.658366775	5.902915984	3.925396125	5.926899103	6.790631673	5.919193251	6.261092692	6.063617463	8.872560251	6.541342492	6.238695066	5.873527551	5.883947647	5.487365025	3.937527882	4.774385195	6.327294253	6.67439488	5.781035265	8.232825781	5.683835186	3.990395217	7.900865633	7.900865633	5.686389096
GSM1380011	0	9.23914047	6.085877466	10.89047381	7.161818298	7.730581852	8.442652203	4.72706714	9.512594314	7.361422618	8.99657677	6.108995604	3.163784926	5.478350256	6.968074792	4.99415895	6.432987717	4.93856774	8.215172281	5.698905895	6.22827487	6.604111769	6.141494437	5.59752457	4.065398686	4.701357895	7.555152436	5.712161452	5.648373758	7.968925507	5.803849836	3.554221941	8.008512343	8.008512343	5.769503292
GSM1380012	0	9.47703737	7.79970789	11.18586609	7.049165605	7.997968832	9.091920477	4.3757992	9.696520132	7.752354209	8.265216595	5.702355075	3.304294481	4.843613829	7.051451337	5.53627823	6.825950919	5.955469625	7.972882276	5.501681151	5.538087957	5.816394017	5.617073358	4.866576042	4.123837104	4.935510036	6.972606185	5.422625551	5.768083984	8.29047887	6.097273263	3.372582499	8.082796956	8.082796956	5.476531132
GSM1380013	0	9.918192048	9.194486496	10.88149235	7.266305603	7.133255015	8.494054843	5.486433298	9.764502269	7.889908799	7.620211855	4.91035783	3.257828982	4.545900892	7.583280329	4.504792667	5.99841397	4.611042891	7.904095812	5.494251477	5.890061102	6.116923093	6.038717156	6.089314476	3.773858219	4.769751554	6.955834489	5.508633778	5.690468635	8.832126297	5.42511644	3.184601161	8.455681086	8.455681086	5.545110234
GSM1380014	0	9.274848884	6.268212389	12.13562634	6.96711701	8.11614657	8.087929895	6.220864195	10.95800318	6.612443428	8.06436336	5.939722012	3.263310102	4.298804362	6.16784464	4.671437578	5.954317209	4.922392551	8.583537443	5.962777921	5.789130123	7.335583923	5.973232367	4.939747245	3.78742649	4.916509847	5.872598345	4.900535935	5.791865623	8.192433025	6.666102263	3.264809645	6.619566951	6.619566951	5.745142125
GSM1380015	0	10.3772695	6.874506431	10.35644513	7.896284842	7.666258112	7.874244229	5.454409992	9.858898803	8.260825387	8.847422354	7.557791838	3.903204764	8.692971602	6.423135879	5.000667445	6.911364226	6.092564011	9.47703737	7.730930652	6.741366709	6.481201858	5.224723175	5.731186045	3.820167591	4.690477115	5.684121662	6.906706865	5.494251477	7.938561612	4.558465521	4.735515302	6.833036965	6.833036965	5.31759133
GSM1380016	1	7.616366522	4.031575793	9.349034532	4.740484672	5.822007743	5.863550266	3.359985369	9.142194651	6.624103144	5.761218419	7.969818567	4.46348036	7.918614034	8.233371175	6.811713775	8.522588964	6.416356793	9.771815852	7.588166122	7.417509792	7.734870123	7.227753824	6.850449017	5.017270564	5.826132082	7.812100636	6.537703012	6.907946882	9.788505064	7.521745524	4.3983261	8.150360207	8.150360207	6.276654613
GSM1380017	1	7.042697698	4.844241322	8.739028611	5.334724802	6.143847169	5.287310983	3.562819363	9.828888741	7.165478579	6.550861565	7.960292509	4.694951603	5.505561288	7.634514071	6.549926885	8.305997455	6.363537878	10.12147365	7.939851276	7.603753568	7.733283651	6.564267553	6.993483711	5.351230743	6.200736715	8.761428771	5.836819526	6.684969275	9.343115735	7.039455347	4.082374629	8.446097041	8.446097041	7.084952467
GSM1380018	1	7.231073394	4.843311892	5.294227091	5.672971682	7.94693738	7.583280329	2.813240902	5.190177344	5.771850194	4.756815576	7.482094725	6.009108192	6.602858794	12.21511487	5.701269167	9.464169367	8.006926478	10.94306818	8.296122685	7.593009327	7.978877024	7.896284842	6.913909717	5.345164288	7.07548918	7.904593393	7.67324512	6.584752011	9.28508279	10.69051585	3.012656286	12.46937784	12.46937784	8.312149199
GSM1380019	1	7.510007548	4.687165561	9.258410995	7.11560198	6.013568749	7.909454644	4.194825907	8.428278484	7.253776301	6.343731401	7.770934341	5.107935211	9.245611521	9.785338772	6.229174668	8.166618127	6.681417689	9.92366309	7.252750809	6.839305188	7.665478584	6.788438259	7.616366522	5.197232801	5.822298145	6.552428286	7.332815681	6.435467271	9.927171956	6.337728353	4.546801292	10.14263551	10.14263551	6.233044231
GSM1380020	1	6.792559545	4.920190704	11.10962112	7.059933857	6.554654866	7.055372281	6.392012423	9.324637883	7.516936759	6.517928851	8.151657404	5.125439217	8.315418743	8.269009979	6.263180915	8.433603399	6.75526747	10.22927611	7.655192831	7.30675261	7.274634019	6.916212174	6.734303687	4.641801478	6.242893793	7.35567206	7.508509508	6.56138469	8.863012842	6.699518865	3.147313987	9.121134089	9.121134089	6.440144637
GSM1380021	0	8.773401338	5.597825814	11.0758973	7.207309405	7.951780162	7.173115472	6.117513252	9.489551093	7.419995415	7.349933841	7.977542662	5.531159378	7.56577796	7.617545252	5.217368895	6.669346172	6.84119342	9.446788115	7.233419761	6.342520552	7.248672918	6.915552082	5.929491313	4.574254642	5.372269842	7.854930673	6.941802656	6.46463669	8.895857287	5.381625023	4.993265187	8.152975233	8.152975233	5.996087992
GSM1380022	1	7.475869163	4.779878348	9.568771976	5.310777952	5.812883525	4.878038346	4.356861201	8.822193961	7.103977368	6.023228079	7.856642125	5.36801017	4.931217927	9.100451993	6.455446431	8.119628097	6.483319073	10.0549798	7.876389828	8.146644826	6.795130009	6.45952687	6.44833828	5.216771596	5.812288528	8.475010791	7.051118883	6.955834489	8.403238883	6.672780918	3.351290808	9.339036569	9.339036569	6.420335982
GSM1380023	1	9.144975238	5.438297804	9.61940932	6.377157783	7.153781928	6.837093806	3.773858219	8.095048578	7.441566909	7.805414625	8.424132604	5.659060183	9.110898323	9.940329715	6.378029512	8.092188018	6.937633352	10.58294981	7.219670227	7.712408345	9.041132961	7.649714901	6.469898153	5.376484721	6.082408287	7.620974523	7.29102369	6.764874158	9.823902865	7.808407646	4.512531817	9.744147028	9.744147028	6.308552391
GSM1380024	1	7.309990658	5.295816423	10.82048619	7.27852034	6.868460142	7.142397467	5.592712816	10.22927611	7.131907766	6.618779558	7.346669077	5.489152761	9.011359967	7.386954379	5.854704619	8.156855435	6.772217661	10.00601831	7.658732185	7.828731343	7.210393255	5.876086148	7.004879432	4.048317023	5.996087992	6.503378106	7.86003935	6.491396291	8.759938737	5.879814463	3.846245486	9.40340245	9.40340245	6.124568371
GSM1380025	1	7.132244415	5.189542214	9.961628012	5.303741604	6.44383302	6.422822492	3.894265555	8.718672775	6.419464233	6.137265884	7.5489151	5.141292773	4.243315833	9.252083548	6.353196972	8.230166521	7.249693955	10.12996073	7.086637898	7.222728675	7.469987007	7.718895454	6.497348941	4.695536229	6.041991709	7.562701657	7.609087428	6.960590693	8.430020724	6.19110821	3.345565887	9.931646964	9.931646964	6.554654866
GSM1380026	1	7.399486032	5.122330176	8.85373347	5.590616637	5.851199702	5.237069558	4.332987935	9.249768656	6.517928851	6.540498216	8.170642551	5.719791726	9.803104818	5.926621901	6.493284	7.547843701	6.91490286	9.55390067	7.659491553	7.453130961	7.700826203	7.478814324	7.374465377	4.660565429	5.779203147	7.24295883	6.530825144	7.200145547	8.402137024	7.028959884	5.470863269	7.27832922	7.27832922	6.412640264
GSM1380027	0	9.073923987	6.80633362	11.00002064	7.373045928	8.152705877	8.180898814	4.539555056	10.08469804	7.791392219	6.632550546	5.97774578	3.412571767	6.029194598	8.27284539	4.637324406	6.634433156	5.831617594	8.107238029	6.076939667	6.328224774	6.49984403	5.830156286	5.840605508	3.63561624	5.49905353	7.041393995	6.508511349	5.578428838	8.833688394	5.764745055	2.851358427	9.888802759	9.888802759	5.7416406
GSM1380028	1	6.649735192	4.972971208	9.828888741	5.436495638	5.974467536	5.854997979	3.985934662	9.383611638	7.25687234	6.27233756	8.219908435	4.916509847	10.1191542	8.594579175	6.892029535	7.852374117	7.421025125	10.18237086	7.280615333	7.299388782	7.598864422	7.453468344	7.222728675	5.653399697	5.955780489	6.956789342	7.57411528	6.995497019	9.451518145	6.475565532	5.000375873	8.644700089	8.644700089	6.495785742
GSM1380029	1	7.314510485	4.985548556	8.928915403	5.240724549	6.532402444	6.198110619	4.768526312	8.948082468	6.143564763	6.530139255	8.533220308	5.916858439	5.401594155	8.299467242	6.625360119	8.085921433	7.522799142	10.29650996	8.401540681	8.093162061	7.768435824	7.159486826	5.940873794	5.073788263	6.504873405	7.358153272	7.728521923	7.685995714	8.531944282	6.25454234	3.843397408	8.986652636	8.986652636	7.026690966
GSM1380030	1	7.03288548	4.836667532	9.418743927	5.385889602	6.630646546	6.614677625	4.880273648	7.887719839	6.815945823	6.325768294	8.880669065	5.776212008	9.202899947	6.808918564	6.759718051	8.525626906	7.682041531	10.44004637	8.17572504	7.203230684	7.591516594	7.835333992	7.395553411	5.288245907	6.470198123	7.498805181	7.894110302	7.058597537	8.562207739	6.608710069	5.779203147	8.213332162	8.213332162	6.697882156
GSM1380031	1	6.964478423	4.319231549	8.889324195	5.171981362	5.921538845	5.575062543	4.65254495	9.038253231	6.102575774	6.757761377	8.019090489	5.803569519	7.102389969	8.063362068	6.844729408	8.025681895	7.1591735	9.841779184	8.284179158	8.129057212	8.023334178	6.797656717	7.025049882	4.853498896	6.160545952	7.685185375	6.887723427	7.337032575	7.684357206	6.550533428	4.335074038	9.091435272	9.091435272	6.532723211
GSM1380032	1	7.35638443	4.744675555	9.749398454	5.243120769	6.030011816	6.461915399	4.377339812	8.197098106	6.240754157	6.123354931	7.964843828	5.162901276	5.442800158	8.416323015	5.987856999	8.213609002	6.977118338	10.1665708	7.80669828	7.601508736	7.809684246	6.709483954	5.454099437	4.873318364	6.432643213	7.646169072	7.092182793	7.019882012	8.799401346	6.397928999	4.508478532	9.100869176	9.100869176	6.808586507
GSM1380033	1	6.588671851	5.331626118	9.623402116	6.462472189	7.138189271	6.60442198	3.446759571	8.376719647	6.807314822	6.542902642	8.453035242	6.407847299	5.458900206	8.812440726	6.13550254	9.194486496	8.299467242	10.61889476	8.464297087	7.86092072	8.044175764	7.065311177	6.246796752	5.410094757	6.84119342	7.098430481	7.691980596	7.457458902	9.703553721	6.524844563	3.812754404	9.375077599	9.375077599	7.194650625
GSM1380034	1	8.282413127	4.842381295	8.257009694	5.897400293	6.630946588	6.638382785	4.00973948	8.534523341	6.686251006	7.031544367	8.395340766	5.370745333	7.31101542	7.328279179	6.415408545	7.95577809	7.053046323	10.26074426	7.599993522	7.141096632	8.176794416	7.384073455	6.427436349	4.96006898	6.154738933	7.721347994	7.578727881	6.574648276	10.20558157	7.149029024	5.341213665	7.897807028	7.897807028	6.365360104
GSM1380035	1	7.993003957	5.306841024	10.70842992	6.407847299	6.494500747	7.853669351	6.213988255	9.309943171	7.528472584	6.916887303	8.943154118	5.926621901	11.10362622	8.352969151	6.617213575	8.015809371	7.172114506	10.44004637	7.667006182	7.682041531	7.39800038	6.161717035	7.498805181	5.553497859	5.950160901	7.309634855	7.330012389	6.947189664	9.52051634	7.010654377	5.655785542	8.714735459	8.714735459	6.642518595
GSM1380036	1	6.624722201	5.046554354	8.61661123	5.276536922	6.729870531	5.603282796	3.839264651	8.357526146	6.522929334	7.607530846	8.900518084	6.865909093	10.54540207	6.960590693	7.586298804	8.401540681	7.774625113	10.58294981	8.48800688	7.778400543	7.056933931	7.283747936	7.873387866	5.571802923	5.918915171	7.591516594	7.519880701	7.493237354	8.534523341	6.605640748	6.040178085	7.491107631	7.491107631	6.879029356
GSM1380037	1	6.714212974	4.555713751	9.506215858	4.890766146	6.129215379	5.355277302	4.402188723	7.689184404	6.488387827	6.494820318	9.499863886	6.686861402	11.21720555	7.993955708	7.925216019	7.938561612	7.928611879	10.55145055	8.359193805	7.960731099	8.310012911	7.68722542	8.294899886	5.341213665	6.19021412	7.304735709	7.947398028	7.45534968	8.459580717	7.805010336	6.240162898	8.898571397	8.898571397	7.129994206
GSM1380038	1	6.754334618	4.593245696	9.434282575	5.285413527	6.34617029	5.815842224	3.795956515	7.804210128	6.100843547	6.467362555	8.541880487	6.407847299	8.938034697	7.611707277	7.072917482	7.169487556	6.897969303	9.84675975	8.539451551	7.812942462	8.123631006	7.093164183	7.704822366	4.738362317	5.732049561	7.685577804	6.916212174	7.379055077	8.266315924	6.76134205	5.85771248	8.615667363	8.615667363	6.69443242
GSM1380039	1	7.43325971	5.170488558	8.762191277	5.437696851	6.126612905	5.76533112	3.602409847	8.839713519	5.821718796	6.866840488	8.597230558	5.597825814	8.372722582	5.161057201	7.348128072	7.952612447	6.907300754	10.27099836	7.481408704	7.904095812	8.44202695	6.810464084	6.751788125	5.042043079	6.487775234	7.43724908	7.135517103	7.428129233	9.081318493	7.481008702	5.802688264	5.948064219	5.948064219	7.092844044
GSM1380040	1	7.598083794	4.992095189	8.829179633	6.13464357	5.786855079	6.320641928	4.427687535	9.334900071	7.059609507	6.861112286	7.603753568	4.610124773	5.548144218	8.147139781	5.893808891	7.712017945	6.167529731	9.681137515	7.360360991	7.398340925	7.509607427	6.49984403	6.762304755	4.693050014	5.874659516	8.01862116	5.447869245	6.282971992	8.972512988	6.398534777	4.366886258	9.026242584	9.026242584	6.479599708
GSM1380041	1	6.81400533	4.672068788	7.609824251	5.47117576	7.289287453	7.604137452	3.305889074	7.994401496	6.460109671	5.615639384	7.522456472	4.529761849	9.018579433	10.18019041	5.444895995	8.498802307	7.785719917	10.74975107	7.37518726	6.302169741	7.548583333	7.954436625	5.804769335	4.964429798	7.01234705	8.27504605	7.471491693	6.435750491	8.537610572	7.529293773	3.713616149	11.01859881	11.01859881	8.632908904
GSM1380042	1	7.349579593	4.953351642	11.34042004	5.280265929	6.16141608	5.917150466	5.166619387	8.392847532	7.093164183	5.926899103	7.763933804	3.976352945	4.291148244	8.981848921	5.504661085	8.229606192	6.32914255	9.771815852	6.871324763	6.897628857	7.332115659	7.530770144	5.17108042	5.10428211	5.577829034	6.96414757	7.209398353	6.16695589	7.676272724	5.615034172	3.549829201	9.779985748	9.779985748	6.418833198
GSM1380043	1	7.233419761	4.487411375	10.41790582	5.434987154	6.314713758	5.584114206	3.920363448	8.032650969	7.404196345	6.199281596	9.155732117	6.303359422	10.97386712	7.658392194	7.12666712	8.341727586	7.49661952	10.32972769	8.403830507	7.149674031	7.62997463	7.443467206	8.208273772	5.576616734	6.19051457	6.091978357	8.183619917	7.140478896	9.272708201	6.620350785	5.205424141	8.278104616	8.278104616	6.891693375
GSM1380044	1	6.87642137	4.231519676	10.23893784	5.166001919	6.471844767	6.14558297	3.281577873	9.201815126	6.670933474	5.979500001	9.037478654	5.704374632	7.931178574	8.87651773	6.596182766	8.475010791	7.399866313	10.49512684	8.224725613	6.794461237	9.516676938	8.003560833	5.938258604	5.361376107	6.08475724	6.767674008	8.284693466	7.051118883	9.501090242	6.971052347	5.532929883	9.301586605	9.301586605	6.649735192
GSM1380045	1	7.080408954	4.814183619	8.491661501	5.383481557	5.711279564	5.993773088	4.017462181	8.190351816	6.407511838	6.542302735	8.492279527	5.437045423	7.617928476	7.346669077	7.250657378	7.414207913	6.593290796	9.812632805	7.640685734	7.721730378	7.756505185	6.508219293	7.718895454	4.97327303	6.126612905	8.064871845	6.890393556	7.100420815	9.504846463	6.911098059	4.96841251	7.661260287	7.661260287	6.570823821
GSM1380046	1	7.002550675	5.477450531	8.265216595	5.879292254	6.601570919	6.226801912	3.563413215	6.759092605	6.069704601	6.647539545	9.6546482	7.726033308	10.95800318	7.748710208	8.787557315	9.160669972	8.087461235	10.93343307	8.820614404	8.428908934	7.921648005	7.164500128	7.614837602	5.456199521	6.318576272	7.591516594	7.450150085	7.555906876	9.093767396	7.86003935	5.386505421	8.481999388	8.481999388	7.46481212
GSM1380047	1	7.382638729	5.102167192	9.835160197	5.958154425	6.647212453	7.177751821	4.913120838	7.929481896	8.068645216	6.604111769	8.838936822	5.908172882	10.65951391	8.238079624	6.775747342	7.905026724	7.019222373	10.20300265	7.734870123	7.582143582	7.475869163	7.318397422	7.575697256	5.655785542	6.265207262	6.701111018	7.212427515	6.994133905	10.43411111	6.716049506	6.336230274	8.972906344	8.972906344	6.4805513
GSM1380048	1	7.993955708	4.761168153	10.96331583	5.357093912	6.10609648	6.100268058	3.873982684	8.737406603	6.223483931	5.617937233	7.246338176	4.790903583	4.563670561	7.526593839	5.267684087	7.095843658	6.376507241	9.581038932	7.286824385	6.900604762	7.526212976	6.221748121	6.428660428	4.44696946	6.141494437	7.429568887	6.270858432	6.40038743	7.621715342	5.822608794	3.86941705	8.857271084	8.857271084	6.267301198
GSM1380049	1	7.291701346	5.215831197	9.61940932	5.577829034	5.393163847	7.08075032	3.920957352	9.524524676	6.551790593	6.234815184	7.078715523	4.380538726	8.125188299	8.330483399	5.08504375	7.038107609	6.020889535	8.874159311	6.988205661	6.833205142	6.883648775	5.993773088	6.607796127	4.997574609	5.936542005	7.691180109	6.635412056	6.535512722	10.07198652	5.638704835	3.66227055	7.806038931	7.806038931	6.225275367
GSM1380050	1	7.43325971	5.012350544	9.642523154	5.526958294	5.945312729	6.016707791	4.162077599	9.006939834	6.276055003	6.650347017	6.945893716	4.678834587	4.327847149	7.407762409	5.836524602	8.207241117	6.715120538	9.712374991	8.138117004	7.750310731	7.790156024	6.626586519	6.726967142	4.761168153	6.492635978	8.652805575	6.860153917	7.113629497	8.547011802	6.60345095	3.197057683	8.186593574	8.186593574	6.366294295
GSM1380051	1	7.751947489	5.063282686	8.541880487	5.919193251	7.114277676	7.796801909	3.494991476	8.590086247	5.844681068	5.689876025	8.417539952	5.630076298	7.862621993	8.856128958	6.015872013	8.609295407	8.088819763	10.55768385	8.619940592	7.784181156	8.174192685	6.852141768	7.167820924	5.352113389	6.522614956	8.094604258	6.72047787	6.964791549	9.269295665	9.076756239	4.299649671	10.02729518	10.02729518	7.957544908
GSM1380052	1	8.059887121	4.358368199	8.903665564	5.673538384	6.102281543	6.316486373	3.854911968	9.268188492	7.174743607	7.300141428	7.927768251	4.923619447	8.505458611	8.613263869	5.604693231	7.585533031	5.93069919	9.601277118	7.328640147	7.267324282	7.855368739	7.052092892	7.174102935	5.642254841	5.949328868	8.260825387	7.255805855	6.372571939	9.992149048	6.629075164	4.618696373	9.732221143	9.732221143	6.198110619
GSM1380053	1	7.891579935	4.851619132	9.559232564	5.650429695	6.888746915	6.401341575	4.119700481	9.321362959	6.271446628	6.444507823	8.893426375	6.709176288	10.33503632	7.666258112	7.385123986	7.826306011	7.361754033	10.2633903	8.26577043	7.817536538	9.081318493	7.460726189	6.966460345	5.359815911	6.419750219	7.585533031	8.402137024	7.226428279	9.168022777	6.804713574	6.334032146	8.77445906	8.77445906	6.797656717
GSM1380054	1	7.495844958	4.512844662	8.964010108	6.456716268	6.754643948	7.607530846	2.936004411	9.690843322	6.469263744	6.416656411	8.565404628	4.992095189	7.498028024	8.745385413	6.244152933	8.063362068	6.75023946	10.25090057	7.521378873	7.403533635	8.022837327	6.31007718	6.948458028	5.46820129	5.445484969	8.206681174	7.281270329	6.502691757	9.403975296	6.67948145	5.814094431	8.885635168	8.885635168	6.620657733
GSM1380055	1	7.341967379	4.715378773	9.669948561	4.972402657	6.070838697	6.476485109	3.019639095	9.506215858	6.891693375	6.518921683	7.917246029	4.920833839	5.957857144	7.705232549	5.98325502	8.373309543	5.767169036	10.1665708	7.145243046	7.203554963	7.86092072	7.331779958	6.444846934	4.651293565	5.957269266	7.343752022	6.794784672	6.746158992	8.494666375	6.58767507	4.461938783	8.206424073	8.206424073	6.430444386
GSM1380056	1	7.198781336	5.762679082	9.311122548	6.240449711	7.111964238	5.38901954	3.65081227	8.1375572	6.139845699	7.502870433	9.454000162	7.213070472	10.40131467	7.917689082	7.578323093	8.775525284	8.704477042	10.68012638	9.048552406	7.597684997	8.095512956	7.098430481	8.080669697	4.742568448	6.563308059	7.0325633	8.206166972	7.620211855	8.220952916	6.905788681	4.96006898	8.785659424	8.785659424	7.093518726
GSM1380057	1	6.767359014	5.382239744	9.675608268	6.123354931	6.26226565	7.711613148	4.289703697	9.589161414	6.754334618	6.503693216	8.863012842	6.599310043	10.48699014	8.191374674	7.312452591	8.350839304	8.312149199	10.06994742	8.161954012	7.537797922	7.296559105	5.928376122	6.923976548	5.065480955	6.257543049	7.991082819	7.767217527	6.924648189	9.331251377	6.450824823	4.750275154	8.463997625	8.463997625	6.484847857
GSM1380058	1	7.259982167	5.352430313	8.939870139	6.599013222	7.070051496	7.710405702	4.709953158	8.792781921	6.315628056	7.01234705	9.623402116	7.407062957	10.71936209	8.123631006	7.525095343	9.157728023	8.270678975	10.83255393	8.607889169	7.714890575	7.897166178	7.218562398	7.286470687	5.734398265	6.411167254	7.521378873	8.318259804	7.32333968	8.255912697	7.809236067	5.95846999	8.60961044	8.60961044	7.467812657
GSM1380059	1	7.965307874	5.254138336	11.82650269	5.128494725	6.489902878	7.04203666	6.173623282	8.369777401	6.745562736	6.548352337	8.889324195	5.846144298	10.68012638	9.657327777	6.708565117	7.227093843	7.46481212	9.811158607	7.401721297	8.388822075	7.953056782	6.673432006	7.718091837	5.643413012	6.711703601	7.809236067	8.11019962	7.578727881	9.606877385	8.134026019	5.553497859	9.813438297	9.813438297	6.865909093
GSM1380060	1	6.735552253	4.800658912	8.462498388	6.313479852	6.666434663	6.714838402	3.527825155	9.390560937	6.241076733	6.915552082	8.668025985	6.451475926	8.297159151	8.949703933	6.838034058	7.739678284	7.531139624	10.38276173	7.882919457	7.337744292	7.79970789	6.805998626	7.094534719	5.055353916	5.976856691	8.122126264	6.607796127	7.168149776	8.744717209	6.81110927	4.588767242	9.092366398	9.092366398	6.751475521
GSM1380061	1	7.068211363	6.154427738	10.58622696	6.650633626	6.943704493	8.47144869	4.421631879	8.577727017	7.173453408	6.402277542	8.324944859	5.70036435	6.78134776	8.920842914	6.594924936	8.907639002	7.700826203	10.24150088	7.111964238	7.143693653	7.321559851	6.761981998	6.379945019	5.244927695	5.557073488	7.212427515	7.712017945	6.147026711	9.642523154	7.244001926	5.335968138	9.376217648	9.376217648	6.867814602
GSM1380062	1	7.230747546	6.001026002	8.832882333	6.967739633	6.661606047	6.099972237	4.362293431	7.630752549	5.933052549	6.669346172	9.415097691	7.006768775	11.85796668	8.991421283	8.055603249	8.272322839	7.765553071	10.32972769	9.052079632	7.92079192	6.700810376	5.981772437	8.137032228	4.683472875	6.012056113	6.294272953	7.235432997	7.402072822	7.585929813	6.924320898	6.080675809	9.800854446	9.800854446	6.723391793
GSM1380063	1	7.707621926	5.244927695	10.67661765	5.598427853	7.053386459	6.845373857	5.59752457	8.937194051	7.19034439	5.91279214	7.893305369	4.848206889	4.760547598	8.533843786	6.134080953	8.367998747	6.861759469	9.893316575	7.572955123	7.162147599	9.286348946	7.276017149	6.862754049	5.166318194	6.319793481	7.505559353	6.90188997	6.385519499	7.262840858	6.880023046	4.289703697	9.18700333	9.18700333	7.141096632
GSM1380064	1	6.490806807	5.257882673	9.088018832	5.46398752	6.623794249	6.294547695	3.722454042	8.725873888	6.335303441	6.276353576	9.412551267	7.104314872	10.69743467	8.534523341	7.345569478	8.781536503	8.550235753	10.82048619	8.895074097	8.737406603	7.863054051	7.584003234	7.710405702	5.138944781	7.058597537	8.026129668	8.733961736	7.848015393	8.696579278	8.045559141	5.933339248	9.584328358	9.584328358	7.514422767
GSM1380065	1	7.708780693	4.732069304	9.56198383	5.532929883	6.357420528	6.54543401	3.606799357	9.645286681	5.95965811	6.72047787	6.936656477	3.795661381	6.002164568	8.417539952	5.684408683	7.941649152	6.005295319	9.640038052	7.146628137	7.301611953	7.979376349	6.777924084	5.942900282	5.474765294	5.947355723	8.275547374	6.56138469	6.539262003	9.176240172	7.053386459	3.68041433	9.312855501	9.312855501	6.585385612
GSM1380066	1	6.36775751	5.026017127	10.80414069	5.215831197	6.600917276	5.687878514	5.175653636	7.820886331	7.075118795	5.810202485	8.423585807	4.778604089	4.589672578	8.054548939	6.833205142	8.822980993	7.207644026	10.25828423	8.194045216	7.673641279	7.32405869	7.394108608	6.09432082	5.044525947	6.529466338	7.321559851	7.263551031	7.108614451	9.579555118	6.81110927	4.088559119	8.911081815	8.911081815	6.776328101
GSM1380067	1	7.257895299	4.666173285	10.80022665	5.668954307	6.560409451	6.200440481	3.560462654	8.583537443	6.899941398	5.694861383	7.883751328	4.657532217	7.67131011	6.424045849	6.299341754	8.798646882	6.982993375	9.838507152	7.318731668	7.024706918	7.705232549	6.864639175	6.977767499	5.248275803	5.80762882	7.897576647	6.739733353	6.625983099	8.404416	6.457023343	4.710520205	7.61618308	7.61618308	6.531782164
GSM1380068	1	6.920452716	6.07230999	9.326872103	6.238695066	6.899941398	6.476485109	4.143705136	7.960292509	5.948202085	6.656653739	9.746393174	7.152722043	9.896659549	7.971160864	7.604893735	8.11614657	7.656390278	10.44857782	9.139363651	8.27504605	7.607162478	6.809241017	7.17872842	4.637628017	6.171908307	7.072917482	8.229606192	7.179062214	9.306709617	8.512173782	6.658502585	8.845455097	8.845455097	7.15170493
GSM1380069	1	7.620576021	5.998698099	9.10128636	6.438235962	8.416940583	7.901482293	3.953937834	7.87552084	6.752416537	6.526120272	8.019090489	5.516115702	8.190869498	7.999361499	6.16459115	7.188056782	7.321559851	9.82711671	8.550908174	8.042268834	7.050484543	5.61322084	6.361052859	5.094248183	5.832752045	6.092263232	7.967487387	5.90644306	10.34848936	7.238121403	4.430376495	8.262742362	8.262742362	6.089591395
GSM1380070	1	6.931116423	4.918625238	9.180411208	5.972081807	6.057356971	5.122668993	4.745355394	8.068645216	6.444183959	6.288065737	9.104039089	6.203091674	8.846632311	7.348525024	7.227436809	8.630791095	7.314510485	10.58622696	8.696579278	8.092188018	8.106303889	7.4570962	7.571073871	5.173220489	6.181336664	6.806631134	7.85021613	7.175744273	8.709458185	7.214459103	5.441877527	8.126431923	8.126431923	7.066910528
GSM1380071	1	7.547075239	5.673538384	8.848150149	5.826132082	6.582464372	5.70036435	4.235389437	8.731753755	6.684639594	6.256022072	8.355172822	5.548144218	7.719692548	7.19361636	6.925637429	8.837439413	7.386954379	10.09978713	7.405255055	7.879777328	8.172648034	6.266399275	7.192617458	5.520313098	5.890339087	8.039343679	6.450177121	7.167139433	9.343115735	6.949132644	4.569158254	7.635878668	7.635878668	6.65439071
GSM1380072	1	8.293214643	6.518921683	10.52421969	6.82208142	8.255912697	6.763582031	5.418707198	9.283923287	6.444183959	8.184184035	8.120116748	5.2473588	11.02670596	9.37223361	6.864028107	7.614060172	6.594267857	9.634252689	8.187368942	7.60300696	7.348525024	6.50012176	6.766728643	4.49915551	5.215226422	5.410678129	7.836649105	6.199281596	9.749398454	6.879359411	5.337525502	9.099982642	9.099982642	6.235121413
GSM1380073	1	6.962188092	5.118137509	9.211278714	5.518802955	6.942111669	6.036934042	4.289703697	8.666654508	7.394108608	7.189345504	9.823902865	6.995803077	10.76557368	8.152182495	6.961551491	8.360975292	7.947834317	10.61557289	8.94390663	7.658732185	7.219670227	8.011064485	7.158844369	5.549405717	6.386768109	7.515112249	8.326045867	7.341275498	9.564637501	8.080669697	7.550023732	8.547324515	8.547324515	7.019882012
GSM1380074	1	5.664838488	3.894574527	9.168022777	4.903335247	5.756176773	4.059143839	3.86387673	8.495248032	6.484560344	6.329771363	9.608375406	6.206068009	10.66964128	6.663195724	7.475130053	8.78978628	8.134555047	10.0448986	8.894280368	7.348891315	5.061786965	7.357451652	8.319891502	4.866576042	4.615344808	5.909660755	6.69351176	6.610553923	4.676065146	6.935375593	6.052327155	7.204382586	7.204382586	6.321834376
GSM1380075	1	7.853669351	5.604964952	8.673637175	5.740443423	6.746158992	7.043967458	4.03100778	10.16430261	6.074028464	6.934067805	7.913782729	4.854672777	9.290839244	8.440850723	6.920452716	7.731710795	6.523235678	9.727092565	7.40632796	7.113947867	7.235071482	7.133570724	7.53965868	5.282024948	5.898877388	7.236786243	7.208729969	6.828453319	9.982225101	6.862434796	5.026017127	8.835608914	8.835608914	6.55882584
GSM1380076	1	6.884897635	3.737630555	8.265216595	5.013244429	5.17808003	6.301228984	3.505849039	9.415097691	6.315628056	7.534819559	7.439754036	4.971803397	9.512594314	8.195105275	5.407671398	6.743618482	5.992999935	9.073923987	7.270833587	7.034188837	7.478090779	6.141494437	6.9178966	5.67216666	6.39455321	8.146124314	6.826265055	7.24114896	9.325812673	6.657285276	4.973933283	8.54538862	8.54538862	5.494554452
GSM1380077	1	7.526973406	5.145836294	9.533739998	4.983671783	6.18480447	4.740484672	3.662848202	8.039818685	7.029936363	6.256022072	9.07205629	6.5996376	8.273916459	9.510075606	6.689061171	8.613941422	7.827535385	10.69051585	8.153244589	8.074976515	7.970251085	8.358084249	6.317366302	5.217665133	6.504317764	7.688762682	7.312813316	7.780038569	9.68661637	6.959626071	4.526966047	9.702822505	9.702822505	6.864028107
GSM1380078	1	6.577766118	4.829608467	8.821451092	4.899011522	6.164304543	5.865046767	3.934758624	8.680016424	6.267918725	6.61152584	8.560915751	5.30527203	9.446788115	7.921648005	6.853064474	8.322715408	6.66546086	10.20558157	8.225266982	7.475869163	7.791392219	7.667006182	7.192959426	5.253828483	6.387092028	8.06582021	7.165821136	7.096482914	8.043703363	7.06756894	4.756815576	9.354291159	9.354291159	6.750548815
GSM1380079	1	6.784577408	4.794612652	10.44004637	5.685810473	5.935104503	6.470198123	4.371472377	7.189345504	6.931116423	6.448010661	7.267979764	3.672322133	5.317283382	9.368730385	6.078055088	8.020039307	6.595552898	9.415097691	7.790973269	7.318062429	7.747472868	6.607796127	6.614347934	5.630076298	6.082716929	8.208273772	6.615633354	7.074815387	9.349034532	6.738102316	3.530713617	9.22995798	9.22995798	6.490513177
GSM1380080	1	7.16880937	4.931807684	9.576874886	5.227164218	5.717423078	5.755317097	3.798873552	8.224197624	7.401001418	7.30194453	8.900518084	6.653125377	11.73443952	8.344506778	7.363875686	7.644240274	7.482094725	10.20080831	8.130555112	7.29973677	7.011340382	7.358508242	8.242337351	5.806786528	6.015010211	7.570680865	7.589274147	7.556287275	9.675608268	7.314177404	6.383944	8.168343808	8.168343808	6.668037866
GSM1380081	1	7.766771746	4.938265115	9.903744817	5.890910392	7.68722542	6.381522038	4.100762858	9.519274239	7.233419761	9.037478654	10.18019041	6.682417816	9.896659549	7.504440012	6.16634816	9.170124876	7.49918459	10.80022665	10.07425411	7.853669351	6.850798104	7.065633945	6.776947823	4.471842468	5.830430306	6.437612706	6.608710069	6.670933474	7.812942462	6.639662567	6.602241874	7.473868669	7.473868669	7.099424265
GSM1380082	1	7.434369579	4.127903307	11.24311735	5.581155281	6.461915399	5.94028799	5.31019237	7.547441608	7.228444398	5.664568831	8.051705223	4.249924133	5.424784251	7.764341792	6.01025988	8.082116201	6.224678534	9.628665416	7.370257251	7.23712144	7.952612447	7.446786547	6.591244712	4.897162745	6.310371272	7.804210128	5.774724892	6.632550546	9.551149062	6.470198123	4.075769756	8.36770615	8.36770615	6.666780205
GSM1380083	1	7.271945907	4.365648925	10.86355208	5.049270297	6.419160426	6.014429696	4.244195845	8.473828457	7.889478355	6.261678444	7.178073168	5.212427423	4.844241322	8.109206646	5.861489023	7.954878564	6.56138469	9.758362747	7.770512211	7.450524312	7.815451255	6.682073849	5.23196802	4.421045574	6.357690066	7.235071482	6.50237845	6.85949742	6.994794198	6.009402711	3.968902915	9.260042317	9.260042317	6.79095341
GSM1380084	1	7.732529257	5.348176386	9.886041572	4.447590073	6.786778783	6.164887475	3.879998459	9.312353471	6.623471158	6.546400338	8.138655784	4.706620709	5.324486226	6.216699486	5.880994565	8.443312213	6.002164568	10.26074426	7.397669894	7.592636437	8.220432851	7.959332659	6.45858382	5.350331422	6.229471531	8.023334178	6.870045447	7.300141428	9.674191456	6.868791722	4.55414518	7.95644372	7.95644372	6.482741817
GSM1380085	1	7.504017333	4.244785601	8.842667863	5.358626814	5.785991847	6.067108471	3.989228044	8.898926317	6.245639024	7.254124864	7.601508736	5.073788263	9.841779184	9.265858093	6.332819189	7.595758038	6.742331503	9.998170857	7.848439842	7.047248172	7.478454719	7.01524022	6.47401658	5.596925378	5.939722012	7.986125898	6.129516	6.924981911	9.689385398	6.933455684	3.785159897	9.392312952	9.392312952	6.349578907
GSM1380086	1	7.790973269	5.472966844	9.95373132	6.08359477	7.001627077	7.280249793	4.113386387	7.837099388	6.889759422	6.325202435	8.698640496	5.929809014	5.747800571	7.20115713	6.639026064	8.546374116	7.547441608	10.35126903	8.028898133	7.788555453	7.329665209	7.016284962	6.594594404	5.086896998	6.333106318	7.502870433	7.090196816	6.966460345	9.84675975	6.609947032	4.701357895	7.867588863	7.867588863	6.69351176
GSM1380087	1	7.273939237	4.992095189	9.164829335	6.203419586	6.765484744	6.607212282	3.232585828	8.387677389	7.617928476	6.440144637	9.687908851	6.946534698	10.3536095	7.703594678	7.183042329	8.51662411	7.932033262	10.73462639	8.011539231	7.069469678	7.719333422	8.032650969	7.62709034	5.304356205	6.413290871	7.38734748	8.398727879	7.072285645	9.764502269	6.668037866	5.80762882	7.909679329	7.909679329	6.894705931
GSM1380088	1	7.883751328	5.122984708	9.219647132	6.198110619	5.747517777	6.40072394	4.467022966	8.883702748	7.596141503	6.445802039	7.857863141	4.369954778	7.777598205	5.658449611	6.032919982	7.553155306	6.034087586	9.749398454	7.131907766	7.215134005	6.501445026	6.366294295	6.6386969	5.747230301	6.061590974	7.174743607	6.586611688	6.403479778	10.23893784	6.642174025	4.620854865	6.962025989	6.962025989	6.248266965
GSM1380089	1	5.719791726	4.658745169	9.201815126	5.960172611	6.876781371	5.688159751	3.641207935	7.581052851	5.118137509	7.252750809	9.891620171	8.592618179	10.57013848	9.137474438	7.824592723	8.548919663	8.648628482	10.64202635	9.515462048	7.078388977	9.692201429	8.129057212	8.379009806	5.103352959	5.184216532	6.487775234	7.108925819	7.379392775	7.026348742	5.557073488	5.296113921	8.587808204	8.587808204	6.72599807
GSM1380090	1	6.419160426	4.252005663	8.638353156	5.644040597	5.046276086	3.96439457	4.081230617	9.466871751	5.956081361	7.198109148	8.044175764	5.620558925	9.110898323	7.353514225	6.278757431	7.585184083	6.963837509	9.681137515	8.440850723	8.029817252	8.10870345	6.314111474	7.249693955	5.303436843	6.041030927	6.924981911	6.762628213	7.250010416	8.685872496	6.409366139	3.830971115	7.761619292	7.761619292	6.155878208
GSM1380091	1	7.738067842	5.302543642	9.182384833	5.704923371	6.912674154	7.064648443	3.724220287	9.343115735	6.088749866	6.457023343	7.791392219	4.583852699	4.534616395	8.240232691	6.294272953	8.820614404	6.972606185	9.788505064	7.011007423	7.513295936	7.898037409	6.383944	6.66036802	5.441313368	6.159701052	7.818375196	6.035508813	6.786460267	8.950597557	6.334359856	3.791277252	8.66156969	8.66156969	6.592693349
GSM1380092	1	6.291480558	4.332681572	9.250892856	5.061185531	6.439547721	6.086437885	4.197567512	7.981079608	5.887754302	7.100420815	9.178236378	7.573355528	5.209438416	8.341118201	7.143991326	8.746057553	7.950020982	10.70465351	8.7904958	7.47917621	7.928611879	7.950906495	6.26226565	4.841186416	6.254828199	8.501238225	6.93799934	7.548225619	8.551546442	6.983663921	5.604693231	8.287221501	8.287221501	7.111262528
GSM1380093	1	7.583280329	5.267684087	11.31144692	6.013863249	7.059933857	7.347777905	3.897625863	8.292120448	8.103954615	6.35230841	7.986125898	5.340279678	6.269945147	9.088018832	6.006462001	8.176794416	6.594594404	10.14144677	7.468179536	6.787148359	7.703975368	7.80882023	6.379945019	5.786582649	6.081524215	6.886124294	7.499906807	6.36200484	10.4896201	6.621885916	4.738362317	8.804949156	8.804949156	6.137555926
GSM1380094	1	8.493520177	5.959350609	10.19139327	6.286335007	7.051758324	6.884897635	4.377012618	8.50000749	6.81236911	7.532193489	8.640954261	5.284526392	9.564637501	7.598469548	6.898621597	7.929924757	6.54198204	9.940329715	7.530770144	7.67324512	7.357451652	7.23745384	7.440129472	4.80921127	5.720071979	6.622852531	7.669352968	6.444183959	9.584960978	7.444872279	6.175715796	8.478903953	8.478903953	6.572408276
GSM1380095	1	9.406477052	6.744555264	8.813990675	7.129994206	8.901322103	7.315250728	3.194688623	8.700771852	7.796801909	7.992560165	6.428660428	3.383652055	10.23425088	9.402829604	4.782273406	5.916858439	5.664024676	9.038253231	6.815945823	5.703778802	8.806128184	7.493615745	7.078715523	5.129726181	4.894467901	5.824680991	7.12864653	5.551464966	9.377854856	5.70095409	4.567049598	10.31759383	10.31759383	5.812569944
GSM1380096	1	7.04758827	4.495779399	9.630093971	5.335968138	6.75023946	5.392276321	3.312470643	7.788167171	7.192617458	6.193782993	9.615219065	6.640236591	9.848512627	8.261354964	6.436368745	9.173200927	7.174102935	10.73061494	8.592003905	8.07402065	7.783329276	8.191374674	7.033236885	5.480152391	6.369582562	7.510007548	9.089991206	7.308870723	9.665700349	6.841825012	5.265576778	8.660851153	8.660851153	7.369911864
GSM1380097	1	6.980039113	5.607593359	8.531944282	5.698620153	5.841728478	6.961863885	4.90302004	9.144115043	5.883947647	6.716326856	7.8079867	4.724201409	4.146939491	9.974326688	6.695365408	7.919045623	6.489902878	9.918192048	7.703975368	7.751525191	7.512209299	5.858305075	6.937633352	5.36707225	5.951043085	8.008736501	5.712161452	7.121903585	7.841642448	6.994458208	3.523548115	10.79829621	10.79829621	6.623794249
GSM1380098	1	7.307103413	4.733611087	8.710200447	5.300979438	6.558155465	5.869640042	4.559400458	9.41000864	6.005295319	6.434223915	8.725873888	6.585689689	8.951458549	7.749140973	7.481408704	8.562825805	7.567256147	10.35126903	9.104039089	7.697585713	7.817536538	7.386954379	7.484273569	4.521064828	6.583387522	6.807630404	7.950020982	7.23441691	8.844301628	6.849165464	5.080416847	8.568406397	8.568406397	6.810464084
GSM1380099	1	7.19034439	4.346131042	10.00601831	5.505268036	6.532095923	5.601143564	4.25171244	7.704409948	6.83129938	6.725361676	9.141222566	7.029271385	7.087898007	8.386476862	6.882676886	8.184184035	8.34912718	10.7229849	8.696579278	7.607530846	8.69088526	7.462234103	6.383313382	5.465799012	6.339208371	7.706785046	6.915552082	6.865594396	10.02840133	7.12803064	5.799773616	8.52530625	8.52530625	6.891693375
GSM1380100	1	7.004212842	4.713514723	9.068323167	5.951330819	5.821106346	7.32405869	4.639828124	9.647822882	6.650042202	6.984949248	8.424712389	6.148498366	8.632908904	7.727705983	6.567014515	7.636057459	7.439395957	10.34052142	7.872042069	7.994848967	7.81172016	6.262875492	7.414556963	5.454409992	6.478681792	8.032650969	6.487775234	6.870670716	8.60585984	6.89406863	4.837828476	7.983616501	7.983616501	6.393928548
GSM1380101	1	7.097468023	4.991488924	8.597230558	5.672706166	5.592437032	7.248037937	3.831834102	7.513295936	7.726426224	7.291367936	7.055703792	5.293330843	11.04286168	9.582306082	5.844368691	6.193193266	6.618134209	8.845859959	6.638382785	6.231599227	7.49017671	6.136385596	8.120116748	6.090452855	5.829049084	7.873811532	7.224060896	6.383313382	8.835204115	5.914805198	4.101975636	9.999114169	9.999114169	5.941448806
GSM1380102	1	7.105985795	4.449961001	10.57976262	5.277171813	6.645338379	6.324905997	4.343455424	7.804210128	6.533356493	5.711588512	9.084156855	5.642830604	6.863734943	8.202353917	6.805044657	9.139363651	7.269396811	10.38797959	8.413389242	7.654368804	7.151032252	8.059410229	6.979037775	4.943725108	6.043524842	6.747111376	7.411009284	7.243653116	9.342036813	7.423860437	4.184429424	8.834815843	8.834815843	7.35457343
GSM1380103	1	7.826306011	4.997879707	9.124621721	5.400960647	6.7483334	5.619383105	5.027540146	8.019090489	6.895979052	7.285440512	9.557833842	6.698508709	8.652805575	8.117674744	6.813020067	8.775525284	7.828731343	10.69051585	8.814709589	8.082554739	7.835752037	7.101081176	6.319489798	5.44517135	6.068235033	7.895376795	7.22068474	6.98562449	9.446788115	8.484179534	6.345866828	8.54036592	8.54036592	7.066910528
GSM1380104	1	6.203708897	4.165911847	9.204010235	5.321786714	5.498180052	5.379206327	3.753752795	9.089991206	6.234512349	6.926305374	8.501238225	5.899734642	10.44558818	6.943704493	7.469642601	7.948248941	7.988401171	9.812632805	8.185286626	8.031695889	7.4890213	6.44383302	8.010623096	5.73749838	6.219663927	7.729765741	7.15241525	7.723635108	8.933086084	6.633157442	4.385233271	7.502693471	7.502693471	6.928204861
GSM1380105	1	7.458580329	4.060008407	8.802341846	5.295507705	6.221748121	6.476485109	2.997123675	10.14144677	6.85818102	7.543309829	9.172206905	5.588848347	9.233775157	7.380453324	6.867814602	8.28814458	7.000987088	10.24150088	8.035042755	8.454823364	7.667006182	7.289287453	6.585057989	5.557073488	6.178982736	7.745773525	7.768032978	7.078064194	8.138655784	6.896609319	6.543864133	8.113909349	8.113909349	6.491696022
GSM1380106	1	7.29834426	3.934113095	9.148702503	4.95914397	5.793833707	5.023947975	3.067799474	8.154250628	6.401045501	6.465519585	8.66402276	5.94028799	8.390585867	9.208145011	6.831008041	8.143200731	7.486847096	10.3536095	8.041768834	7.329296145	8.016765877	8.371600212	6.873209143	5.544193955	6.024107828	6.580964186	7.360705713	7.179062214	8.065318418	6.533041765	4.934899093	9.218011572	9.218011572	6.781993441
GSM1380107	1	7.207644026	4.926976691	8.267969322	5.919498258	6.606272128	7.093518726	3.282158848	8.987086383	6.669666366	6.567313576	8.418152965	4.735515302	10.01391606	8.498802307	7.333141619	8.313779732	6.368958716	10.22681075	8.040768088	7.006142092	7.938986011	7.414556963	7.437605326	5.444594381	5.881273059	7.627918228	7.380099304	6.641478554	9.379076773	6.886448854	5.400332712	8.870565137	8.870565137	6.591552882
GSM1380108	1	7.600373204	6.377440359	10.07198652	6.944340562	5.963370579	7.031877632	3.309457534	8.47144869	6.805044657	6.264367121	7.422071485	4.460012271	4.231217381	8.497023882	5.970657672	7.987506331	5.941145621	9.86062464	7.241459723	7.409547473	7.440488057	7.048832117	6.839634389	5.193558896	5.722751774	7.837902645	5.979229479	6.461915399	9.215544008	6.686546699	4.676065146	8.81204533	8.81204533	6.30392395
GSM1380109	1	7.189680886	4.828308015	10.47766477	6.198394452	6.138467583	7.379732107	4.646435852	8.609295407	7.261848023	6.407847299	8.131522595	5.486433298	7.891162235	7.663023295	6.182813927	8.075956208	7.161492517	10.09346386	7.788555453	7.443802491	7.895376795	6.763263505	7.388676002	5.593332494	6.497964742	6.907300754	8.287524733	6.642518595	9.272708201	6.886124294	5.759146074	8.144403701	8.144403701	6.553409976
GSM1380110	1	7.805832372	5.056580409	11.53247251	6.5996376	6.470888544	7.082717348	6.675975872	8.496436547	7.465173326	6.282069781	8.411607049	5.308637441	7.735688958	7.024706918	6.109285159	7.760539187	7.129347002	9.705032103	7.825483128	7.456731455	8.025681895	6.719494703	7.12864653	5.638704835	6.224678534	6.913295969	7.950020982	6.5759005	9.425884701	6.890072302	4.907837825	8.259483828	8.259483828	6.6386969
GSM1380111	1	7.653585905	5.868758443	8.966648256	6.514784332	6.885183626	7.598864422	4.910642229	9.525843981	6.789702368	7.333473323	8.659117885	6.099708443	11.53247251	8.750994211	6.683054786	8.125188299	6.616251572	10.09778376	8.011064485	7.315250728	7.542226618	7.211069488	7.870419115	5.565851476	5.637263095	7.113947867	8.219328702	6.827543715	9.480801578	6.930119209	6.474646589	9.084630122	9.084630122	6.489902878
GSM1380112	1	7.328957161	5.085644271	9.589161414	5.598717453	6.671536844	6.996808921	4.082661817	8.187368942	7.683960264	6.627512664	8.537610572	5.526958294	8.577102606	9.454000162	6.614347934	7.978405331	6.968387736	10.35126903	8.262469465	7.309634855	7.991082819	7.93814556	7.191019795	5.332546879	6.265207262	7.173115472	8.011539231	6.945287866	9.820682649	6.547726705	5.482883357	9.409417115	9.409417115	6.716049506
GSM1380113	1	7.450524312	4.263066418	8.930596122	5.795305476	6.194922816	5.785717035	3.536302222	8.727305522	6.137265884	7.19745446	8.574459734	6.045592797	8.224725613	7.667834439	6.177226587	8.223660927	7.434369579	10.13676004	8.063362068	7.80669828	7.417509792	6.692569978	7.238495334	5.401878641	6.304218494	8.190869498	7.689975006	7.230747546	9.630093971	6.637108543	4.022810039	7.876593815	7.876593815	6.350497053
GSM1380114	1	6.748044032	4.90302004	10.01391606	5.273451768	6.124263586	5.760642529	3.867949121	9.079432752	6.633784977	6.582783923	7.577919528	5.334724802	4.807394297	6.170695855	6.677260192	7.754806727	7.018549362	10.08664919	7.239172049	7.469268557	7.277769282	7.39800038	6.869103494	5.175325031	6.048833655	8.086482231	7.23610365	6.768673573	9.157728023	6.332518036	4.169219318	7.299939099	7.299939099	6.462764725
GSM1380115	1	7.773006491	6.66995264	9.049436564	7.804592534	6.494191353	7.8079867	5.003702557	8.047426411	6.783648319	6.82875931	7.730930652	4.928719007	7.478454719	7.043019709	6.305153403	7.495844958	6.875163344	9.806348055	7.187721349	7.603366041	7.894963842	5.299137249	6.723063847	5.751007126	5.63543963	7.919923753	6.57432624	6.265207262	9.630093971	7.265285646	4.728040184	6.97663515	6.97663515	6.218189361
GSM1380116	1	7.152722043	5.698339077	8.620615064	5.669551704	6.518255245	5.767169036	5.029621957	8.969223867	5.859768412	6.987184339	9.507417877	8.399884364	10.62861649	7.85021613	7.644646532	9.148702503	9.171149179	10.75798915	9.192532733	8.328282412	7.713214478	8.175232897	7.865680212	5.544193955	6.741702009	8.029817252	8.12715232	7.691980596	8.625336997	7.045961254	5.018498948	8.592976263	8.592976263	7.24900302
GSM1380117	1	6.577766118	5.627383817	8.027480999	5.373797499	6.441050554	6.615325066	3.750502421	8.874159311	5.859476556	6.189897333	8.88686444	7.677016414	7.553155306	7.371277857	7.169145176	9.383611638	9.227354598	10.93343307	8.494666375	8.232825781	7.601850625	7.230097745	7.232796357	5.446108744	6.604111769	7.505186195	7.879777328	7.832831958	9.399137407	8.152705877	4.719100296	8.268244933	8.268244933	7.810064442
GSM1380118	1	7.434369579	5.275637942	8.242337351	6.288768482	6.810783123	7.632319006	2.983837967	9.978237459	6.557514659	6.44515077	8.787557315	5.588848347	10.09978713	7.764733004	6.026822152	7.994848967	7.186036175	10.22197464	7.837902645	7.272953048	7.726033308	7.249335528	6.9178966	4.97268142	6.320641928	7.361754033	7.763498648	7.015950836	9.734362323	6.999382951	5.213396709	8.8970722	8.8970722	6.607212282
GSM1380119	1	7.233082001	6.695074343	10.16430261	7.162147599	6.60057899	7.911684361	6.4630694	8.407425861	5.816977173	6.513485211	8.959020162	6.297849681	9.23046889	10.65605517	6.848531897	8.695899808	8.201841008	10.41231789	8.742581114	7.92079192	7.582912665	5.793255469	7.607953103	4.667808386	6.428350175	7.748710208	7.746990875	6.490230694	9.369918731	6.62874591	4.170967519	11.08994331	11.08994331	6.752416537
GSM1380120	1	7.135842954	4.976332564	8.472657286	6.622503628	6.379010187	6.255697312	3.650501881	10.03860496	6.572079585	6.723063847	7.585533031	5.083530395	4.991166862	9.246734554	6.185092584	8.366161778	5.534735427	10.08664919	7.809684246	7.773006491	7.422439431	6.134080953	6.931442321	5.043643434	5.840605508	8.026984155	6.439547721	6.522614956	8.961387712	6.865909093	3.109723036	10.09234547	10.09234547	6.136684879
GSM1380121	1	7.759302203	4.668710352	10.17797739	5.389608498	7.144942576	5.280832509	4.505112448	8.008288186	6.716961018	6.086158012	8.631466394	5.97833553	9.497263461	6.071729789	6.776947823	8.399313793	7.500970692	10.21018951	8.140625338	7.167449597	8.230166521	8.202353917	7.451284084	4.97149349	6.181926254	5.823173416	7.689573638	7.47917621	8.752467957	6.42343297	5.275005562	7.35798043	7.35798043	6.934745456
GSM1380122	0	10.58294981	7.649714901	11.52149016	7.432132355	9.090950067	7.213070472	3.865948205	10.20780447	8.679325977	8.280104221	6.104609722	4.614135267	4.59087839	3.778390904	6.241671824	7.246338176	6.824717242	8.517894768	5.757362419	6.505517403	6.059054325	6.074939553	5.187316926	4.103767762	5.19141666	6.717267729	5.654610181	6.203708897	7.34522211	5.628265698	3.648745892	6.153713213	6.153713213	5.650984932
GSM1380123	0	7.489782659	6.338001913	9.812632805	5.406223567	6.140110353	4.768834616	2.579595459	9.073923987	6.211306582	7.188678916	6.708873572	5.149540699	4.892906513	9.720871959	5.397284915	7.275674662	5.954903689	9.242445599	8.341727586	6.911098059	8.390023308	7.295554769	8.564121119	3.8572859	5.342142216	5.530856409	6.556555201	6.863400683	8.181442101	6.897628857	4.612615983	9.082802338	9.082802338	6.162617725
GSM1380124	0	10.44004637	6.419160426	11.73443952	7.211404797	8.334210846	8.208273772	5.340906144	10.11698458	6.654710931	8.143200731	6.959325855	3.688567758	5.995239597	8.448304427	4.745355394	6.19021412	5.806514051	8.679325977	5.427793632	5.761494014	7.138189271	6.196360378	5.294227091	3.846835299	5.154070063	5.852650643	5.71916682	6.15708453	7.556287275	5.308331768	3.803595983	9.218011572	9.218011572	5.899155601
